1 **Single-cell atlas of mouse limb development reveals a complex spatiotemporal**  
2 **dynamics of skeleton formation**

3 Svetlana Markman<sup>1‡</sup>, Mor Zada<sup>2‡</sup>, Eyal David<sup>2</sup>, Amir Giladi<sup>2</sup>, Ido Amit<sup>2\*</sup> and Elazar  
4 Zelzer<sup>1\*</sup>

5 1. Department of Molecular Genetics, Weizmann Institute of Science, Rehovot, Israel

6 2. Department of Immunology, Weizmann Institute of Science, Rehovot, Israel

7 ‡These authors contributed equally

8 \*These corresponding authors equally contributed to this work.

9 **Abstract**

10 Limb development has long served as a model system for coordinated spatial patterning  
11 of progenitor cells. Here, we identify a population of naïve limb progenitors and show  
12 that they differentiate progressively to form the skeleton in a complex nonconsecutive  
13 three-dimensional pattern.

14 Single-cell RNA sequencing of the developing mouse forelimb revealed three progenitor  
15 states: naïve, proximal and autopodial, as well as *Msx1* as a marker for the naïve  
16 progenitors. In vivo lineage tracing confirmed this role and localized the naïve  
17 progenitors to the outer margin of the limb, along the anterior-posterior axis. Sequential  
18 pulse-chase experiments showed that the progressive transition of *Msx1*<sup>+</sup> naïve  
19 progenitors into proximal and autopodial progenitors coincides with their differentiation  
20 to *Sox9*<sup>+</sup> chondroprogenitors, which occurs along all the forming skeletal segments.

21 Indeed, tracking the spatiotemporal sequence of differentiation showed that the skeleton  
22 forms progressively in a complex pattern. These findings suggest a new model for limb  
23 skeleton development.

## 24 **Introduction**

25 Limb development has long served as a central model system for studying organ formation.  
26 Over the years, extensive research has identified key components in the genetic program  
27 that controls both patterning and differentiation of the different tissues composing the limb,  
28 as well as the complex signaling involved in regulating this genetic program (Delgado and  
29 Torres, 2017; Huang, 2017; Johnson and Tabin, 1997; Nassari et al., 2017a; Niswander,  
30 2003; Tickle, 2005; Zuniga, 2015). These studies have produced the basic concepts of how  
31 progenitor cells pattern and differentiate along the three axes to form a complex functional  
32 organ (Petit et al., 2017; Tabin and Wolpert, 2007a; Zeller et al., 2009).

33 The mouse forelimb starts to develop around E9.5 as a small outgrowth from the body wall.  
34 Initially, the limb bud comprises seemingly homogeneous undifferentiated mesenchymal  
35 cells covered by a layer of ectoderm. At the distal side, along the anterior-posterior border,  
36 the ectoderm thickens to form the apical ectodermal ridge (AER). As development  
37 proceeds, the limb is elongated and the hand plate is formed. Concurrently, the  
38 development of the limb skeleton is initiated, as mesenchymal cells form condensations  
39 that prefigure the future skeletal elements.

40 The vertebrate limb skeleton is organized in three segments: stylopod, containing humerus  
41 in the forelimb or femur in the hindlimb, zeugopod, comprising radius and ulna or tibia and  
42 fibula and autopod, comprising the wrist or ankle and digits. Surgical removal of the AER  
43 during early wing-bud development resulted in severe truncation of the distal elements.  
44 Moreover, the later the AER was removed, the more distal elements were formed. These  
45 findings led to the perception that the skeletal elements of the limb form in a proximal-to-  
46 distal order under the regulation of the AER (Saunders, 1948; Summerbell et al., 1973).  
47 Several models have attempted to explain this mode of development (Tabin and Wolpert,  
48 2007a). The progress zone model is named after a distal domain under the AER, where  
49 limb progenitor cells are postulated to be located (Saunders, 1948; Summerbell et al.,  
50 1973). According to this model, the longer these progenitors spend in the progress zone,  
51 the more distal their progeny become. Once the cells exit this domain, their fate is  
52 determined. The result is that the first cells to leave the progress zone form the stylopod,  
53 the next to leave form the zeugopod, and the cells that exit last form the autopod (Saunders,  
54 1948; Summerbell et al., 1973; Wolpert, 2002). An alternative model posits that

55 progenitors of the limb segments are specified early in development, organized in three  
56 parallel stripes, and then expand progressively in a proximodistal order (Dudley et al.,  
57 2002; Sun et al., 2002). The two-signal model suggests that proximal and autopod  
58 progenitors are specified by two opposing signals deriving from the flank and AER,  
59 respectively. Later on, as the limb bud grows, a third domain of the zeugopod is formed in  
60 the middle (Mariani et al., 2008; Mercader et al., 1999a, 2000).

61 Recently, several works have studied mouse and chick limb development at single-cell  
62 resolution (Desanlis et al., 2020a; Feregrino et al., 2019; Kelly et al., 2020). Despite their  
63 findings, fundamental aspects of this process are still missing. For example, the identity of  
64 limb progenitors and their spatial distribution are unclear, as we lack marker genes to  
65 identify them. The temporal changes the transcriptome of these progenitors undergo during  
66 development and the sequence by which they differentiate to form the limb skeleton have  
67 yet to be uncovered, too.

68 In this work, we establish a single-cell atlas of the developing limb and characterize limb  
69 progenitors. We identified three progenitor populations, namely naïve, proximal and  
70 autopodial limb progenitors. We established *Msx1* as a marker for the naïve progenitors  
71 and their location in the outer margin of the developing limb, along the anterior-posterior  
72 axis. We then showed that these *Msx1*<sup>+</sup> naïve progenitors transit progressively and  
73 simultaneously into either proximal or autopodial progenitors. Moreover, the progressive  
74 contribution of these progenitors to the forming skeleton occurs simultaneously all along  
75 the proximal-distal axis of the limb. Finally, temporal analysis of the differentiation of  
76 *Msx1* lineage cells revealed that the skeleton forms in a complex nonconsecutive three-  
77 dimensional pattern, which extends to the level of the single element.

## 78 **Results**

### 79 **Single-cell RNA sequencing provides a comprehensive cellular and molecular atlas of** 80 **the major mesenchyme-derived cells types of the developing limb**

81 To date, the identity of limb mesenchymal progenitor cells and their differentiation paths  
82 are only partially understood. To obtain a deeper and unbiased molecular characterization  
83 of mesenchymal progenitor cells, we generated transcriptional maps of mesenchymal  
84 lineages in the developing limb between E10.5 and E14.5 by applying a massively parallel

85 single-cell RNA-seq (MARS-seq). During this time window, mesenchymal cells undergo  
86 major patterning and differentiation to form the different tissues of the limb, including  
87 muscle connective tissue, tendons, ligaments and skeleton. To ensure representation of the  
88 different cell types and differentiation states, including rare subpopulations, we combined  
89 lineage and reporter-based single-cell analysis using *Sox9* and *Scx*, the earliest known  
90 markers for skeletal and tendon cells, respectively (Akiyama et al., 2002a; Bi et al., 1999;  
91 Schweitzer et al., 2001).

92 At E10.5, we sampled a *Sox9-GFP* transgenic mouse line and collected both *Sox9*<sup>+</sup> and  
93 negative cell populations. Because *Sox9* marks multiple cell types (Akiyama et al., 2005;  
94 Nagakura et al.; Soeda et al., 2010; Sugimoto et al., 2013), to follow the dynamics of  
95 different lineages and to ensure the representation of tendons we generated a compound  
96 mouse model containing *Sox9-CreER<sup>T2</sup>* (Soeda et al., 2010), *tdTomato* (Madisen et al.,  
97 2010) and *Scx-GFP* (Pryce et al., 2007). Tamoxifen was administered at different  
98 developmental time points between E9.5 and E12.5 and samples were harvested 48 h later.  
99 Thus, we sampled four cell populations: tdTomato-positive (*Sox9*<sup>+</sup> skeletal lineage), GFP-  
100 positive (*Scx*<sup>+</sup> tendon cells), tdTomato-GFP double-positive cells, and double-negative  
101 cells (other progenitors). Then, 32,000 quality-filtered cells (see Methods) were subjected  
102 to MARS-seq to generate a limb cellular atlas. We used the MetaCell algorithm (Baran et  
103 al., 2019) to identify homogeneous and robust groups of cells, referred to as meta-cells  
104 (MCs; see Methods). To focus on mesenchymal cell lineages, MCs of non-mesenchymal  
105 origin, such as red blood cells, muscle cells, ectoderm-derived cells and Schwann cells,  
106 were excluded from the analysis (Table S1; Methods). The remaining 250 MCs were  
107 grouped into 12 molecularly distinct populations (Fig. 1B-F; Fig. S1).

108 To annotate clusters as chondrocytes or connective tissue fibroblasts, we performed  
109 differential gene expression analysis. We used the established markers *Sox9*, *Col2a*, *Wwp2*,  
110 and *Col9a2* for the former and *Colla1*, *Col3a1*, *Scx*, *Osr1*, *Dcn*, and *Lum* for the latter  
111 (Akiyama et al., 2002b; Bell et al., 1997; Bi et al., 1999; Lefebvre et al., 1997; Liu et al.,  
112 2015; Nakamura et al., 2011; Schweitzer et al., 2001; Stricker et al., 2012; Vallecillo-  
113 García et al., 2017). Results showed that subsets C1-6 represent distinct chondrocyte  
114 subpopulations and groups CT0-CT2 represent distinct connective tissue fibroblast  
115 subpopulations (Fig. 1C,D,F; Fig. S1). Cells in subsets P1 and P3 expressed neither

116 fibroblast nor chondrocyte markers and were therefore annotated as mesenchymal  
117 progenitors (Fig. 1C-F). A large gene signature defined these progenitor types including  
118 *Hist1h2ao* (Table S2), which was expressed by P1-P3 cells but not by any of the  
119 differentiated cell types (Fig. 1E,F). P1 cluster was characterized by co-expression of  
120 *Hmga2*, *Asb4*, *Igdcc3*, *Msx1* and *Lhx9*. *Msx1* and *Lhx9* are transcription factors (TFs) that  
121 are expressed in limb mesenchyme and play a key role in limb patterning (Bensoussan-  
122 Trigano et al., 2011; Lallemand et al., 2005; Tzchori et al., 2009), whereas *Hmga2* is  
123 widely expressed in undifferentiated cells during embryogenesis (Ulrike Hirning-Folz,  
124 Monika Wilda, Volkhard Rippe, Jorn Bullerdiek, 1998; Xianjin Zhou, Kathleen F. Benson,  
125 1995). *Asb4* is a ubiquitin ligase and *Igdcc3* is a member of the immunoglobulin  
126 superfamily, with a suggested role in early embryogenesis (Salbaum, 1998). Interestingly,  
127 these progenitors lacked a spatial signature.

128 P2 cells expressed a gene module that largely overlapped with that of P1; however, P2 cells  
129 lacked the expression of *Msx1* and *Lhx9*. Instead, this cluster was characterized by high  
130 expression of *Shox2*, *Dlk1*, *Zfx3-4*, *Scx*, and *Col3a1*. *Shox2* is a TF that is expressed at the  
131 proximal limb bud, where it acts as a patterning gene (Sun et al., 2013). The P3 subset was  
132 characterized by high expression of *Hoxd13*, *Msx1*, *Lhx9* and *Aldh1a2*. The known role of  
133 these genes in regulating autopod patterning suggests that this cluster represents  
134 progenitors of the autopod (Fromental-Ramain et al., 1996; Scotti et al., 2015a). Overall,  
135 we identified three progenitor populations, two of them carrying a signature of either  
136 proximal or autopodial markers, whereas the third population lacked a typical signature.

137 Subsets CT0-CT2 were characterized by the expression of *Col5a1*, *Col3a1*, *Colla1* and  
138 *Osr1*, all of which are markers of connective tissue/tendon. In addition, these cells also  
139 expressed *Lgals1*, which was implicated in modulating cell-cell and cell-matrix  
140 interactions. Other identified markers were *Kctd12*, encoding for a potassium channel, and  
141 tropomyosin (*Tpm1*). Interestingly, CT0 cells did not express the key tendon marker *Scx*.  
142 Instead, this cluster was characterized by expression of the markers *Msx1*, *Hoxd13*, and  
143 *Aldh1a2*, similar to the P3 signature. The transcriptional similarity between CT0 and P3  
144 suggests that some P3 autopod progenitors give rise to CT0 cells. CT1 and CT2 were both  
145 characterized by the expression of tendon markers *Scx*, *Dcn* and *Lum* (Liu et al., 2015;

146 Schweitzer et al., 2001). In addition, cells of both clusters expressed the TF *Zfmx4*, *Zfmx3*  
147 marked CT1 cells, whereas CT2 was marked by high expression of *Dlk1*, *Igfbp5* and *Sparc*.  
148 In the chondrocyte compartment, subsets C1 and C2 displayed low expression levels of  
149 cartilage-specific ECM genes (cECM), such as *Col2a1*, *Col9a1-3*, *Coll1a1-2* and *Hapln1*,  
150 indicating the early differentiation stage of these clusters. In line with this, C1 displayed  
151 high expression levels of *Asb4*, *Shox2*, *Hmga2* and *Igdcc3*, which marked cluster P2,  
152 suggesting that cluster C1 originates from P2 cells. Cluster C2 displayed high expression  
153 of the TFs *Ebf1* and *Sfrp2*, a soluble modulator of Wnt signaling, and of the autopod marker  
154 *Hoxd13*, suggesting that this cluster represents early autopodial chondrocytes. Subset C3  
155 displayed expression of *Hoxd13*, intermediate levels of cECM genes, and high *Tgfb1*  
156 expression, suggesting that it represents more mature autopodial chondrocytes. Subset C4  
157 displayed intermediate expression levels of cECM genes in combination with several  
158 fibroblast markers, specifically high expression of *Coll1a1* and low expression of *Scx*,  
159 *Col3a1* and *Lgals1*. These results suggest a chondro-tendinous identity of these cells (Blitz  
160 et al., 2013; Sugimoto et al., 2013). Subset C5 displayed high expression levels of cECM  
161 genes along with the autopod marker *Hoxd13*. Therefore, it represents the most mature  
162 state of autopodial chondrocytes. Subset C6 displayed the highest expression levels of all  
163 cECM genes, thus likely to represent the most differentiated chondrocytes.

164 To elucidate the temporal dynamics of identified cell populations, we annotated the  
165 enrichment of each population over time. As shown in Figure 1G, dramatic changes in cell  
166 type composition were observed during development. While P1 was the most abundant cell  
167 population at E10.5 (52%), it gradually decreased until it was completely diminished by  
168 E14.5. Proximal progenitors (P2) also constantly decreased from 31% at E10.5 to 3% by  
169 E14.5. In contrast, autopodial progenitors (P3) were rare at E10.5 (4%), increased up to  
170 21% by E12.5, and later on started to decline reaching 6% by E14.5. Among the  
171 differentiated cell types, early proximal chondrocytes (C1) were rare at E10.5 (8%). By  
172 E11.5, C1 increased to 20% and early autopodial chondrocytes (C2) appeared (5%),  
173 concurrently with the appearance of tendon fibroblasts CT1 (4%) and CT2 (3%). At E12.5,  
174 C1 dramatically decreased (6%), while C2, CT1 and CT2 increased (16%, 7%, and 6%,  
175 respectively). Additionally, at E12.5 we saw the appearance of more mature chondrocytes  
176 C3-C6 (8%, 3%, 2%, and 6%, respectively) and CT0 (5%). At E13.5, C1 continued to

177 decrease (2%) along with a decrease in C2 (10%), whereas more mature chondrocytes (C3-  
178 C6), CT1, CT2 and CT0 increased (chondrocytes, 10%, 5%, 6%, and 7%, respectively;  
179 CT, 13%, 12%, and 10%, respectively). By E14.5, C1 was diminished, C2 continued to  
180 decrease (7%), C3 and CT1 displayed a slight reduction (8%, 12%), while C4-C6, CT2 and  
181 CT0 further increased (to 10%, 9%, 14%, 13%, and 15%, respectively).

182 Overall, these data reveal the main mesenchyme-derived cells types in the developing limb,  
183 as well as valuable cell type-specific markers for studying their differentiation trajectories  
184 and dynamics. We identified three populations of progenitors, including autopodial and  
185 proximal progenitors and a third progenitor population that lacks spatial signature.  
186 Interestingly, we failed to identify a zeugopodial progenitor population. Finally, the  
187 gradual reduction in progenitor cells and increase in differentiated cells suggests a  
188 progressive differentiation process in the developing limb.

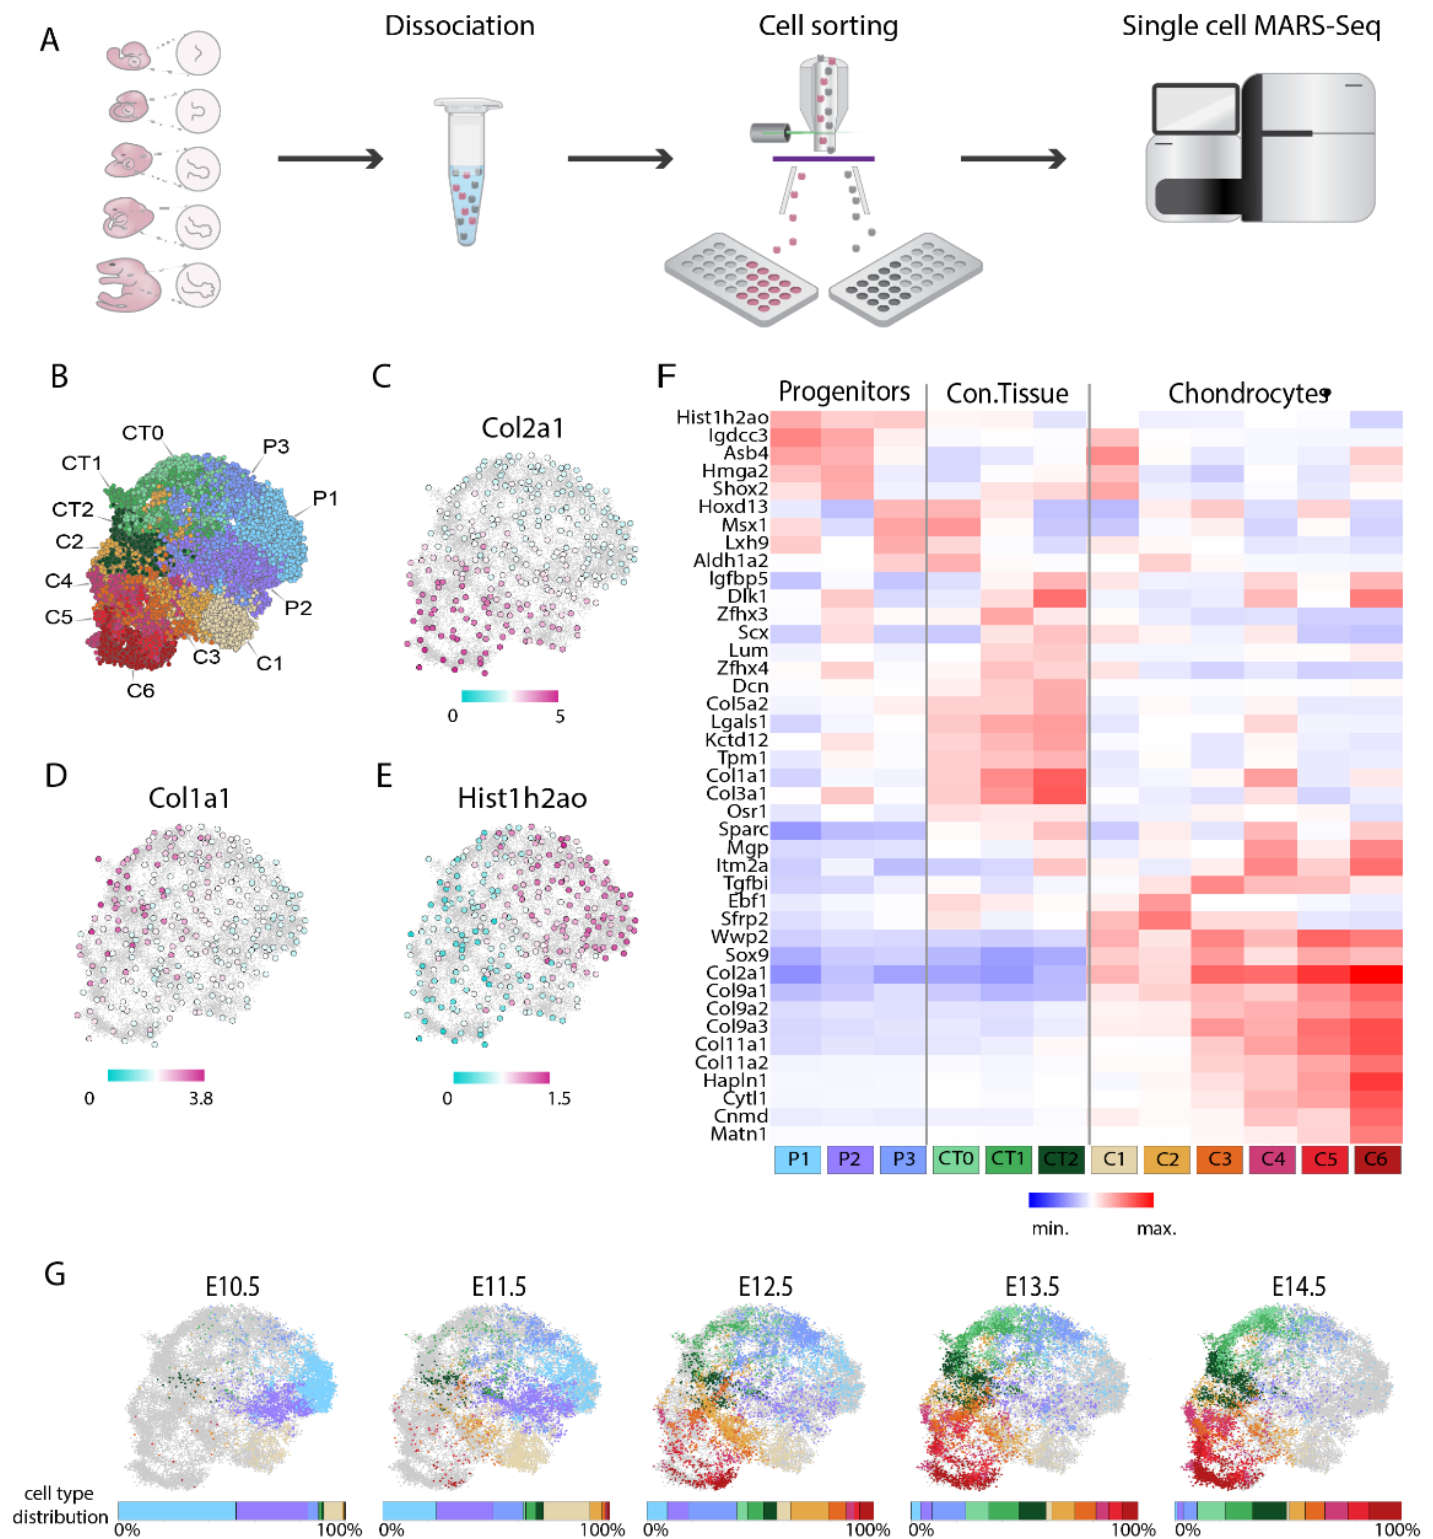

**Figure 1. Single-cell RNA sequencing of mouse forelimb mesenchymal cells during embryonic development**

189 (A) Scheme showing the experimental design. Forelimbs were dissociated into single  
 190 cells, which were then FACS-sorted into 384-well plates. Isolated cells were subjected to



191 massively parallel single-cell RNA sequencing (MARS-seq). At E10.5, *Sox9-GFP*  
192 embryos (n=3) were used to separate between GFP-positive and negative cells.  
193 Additionally, cells were collected from *Sox9-CreER<sup>T2</sup>; tdTomato; Scx-GFP* embryos (n=2)  
194 without Cre activation. For collection of cells from E11.5-E14.5 embryo forelimbs, we  
195 used *Sox9-CreER<sup>T2</sup>; tdTomato; ScxGFP* mice (n=4-5 per stage), in which *Sox9<sup>+</sup>* cells were  
196 labeled by tamoxifen administration 48 h before harvesting and sorted into *tdTomato<sup>+</sup>GFP<sup>-</sup>*  
197 , *tdTomato<sup>-</sup>GFP<sup>+</sup>*, double-positive and double-negative cells.

198 (B) *k*-nearest neighbors (*k*-NN) graph of 26,131 mesenchymal cells (250 metacells)  
199 associated with 12 annotated and color-coded cell types and states.

200 (C-E) The 250 metacells were subdivided into three main cell populations, as shown by  
201 log<sub>2</sub> fold change in gene expression of *Col2a1* (C) *Coll1a1* (D) and *Hist1h2ao* (E) genes  
202 projected onto the *k*-NN graph.

203 (F) Heatmap showing log<sub>2</sub> fold change in expression of known and newly identified marker  
204 genes in 12 transcriptionally distinct cell populations.

205 (G) Projection of single cells onto the *k*-NN graph shows cell type distribution at different  
206 developmental stages.

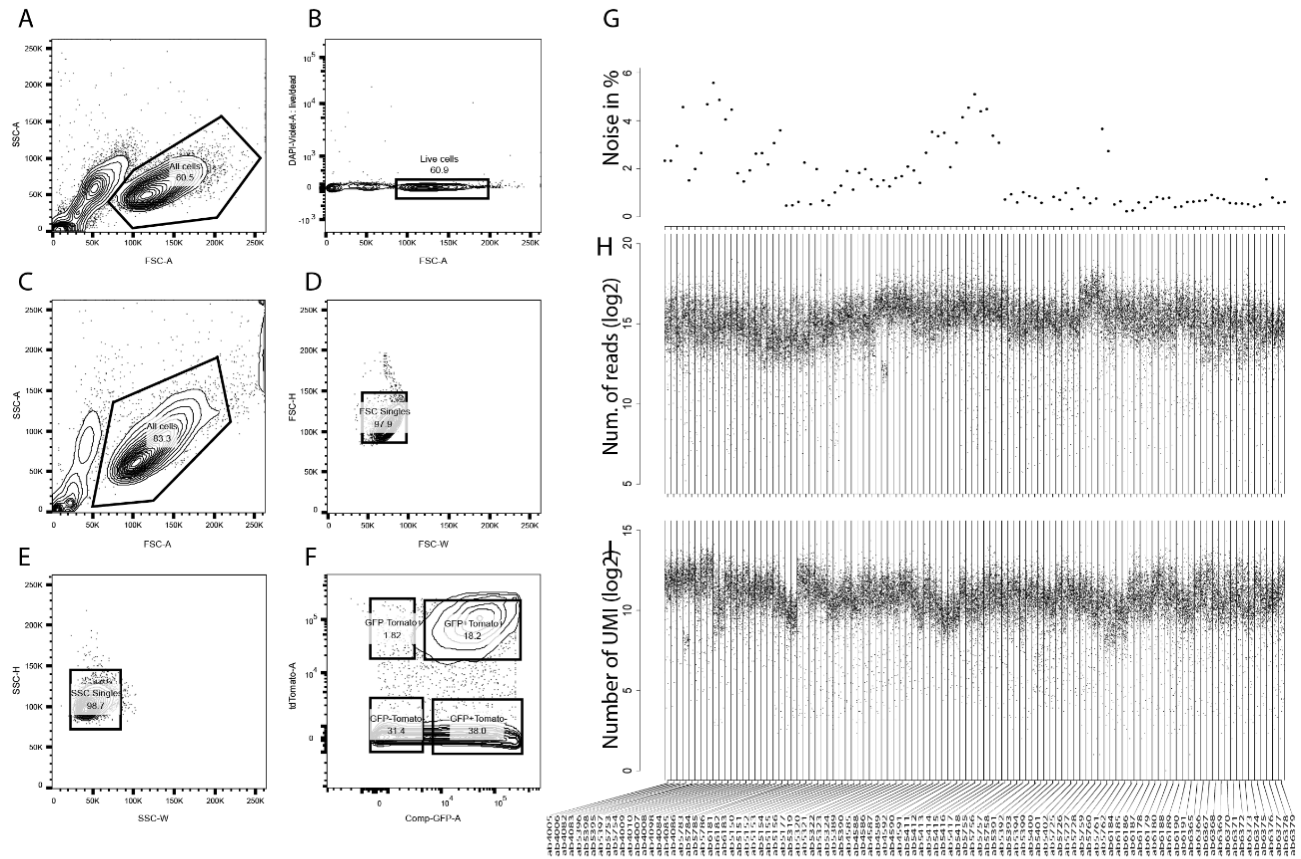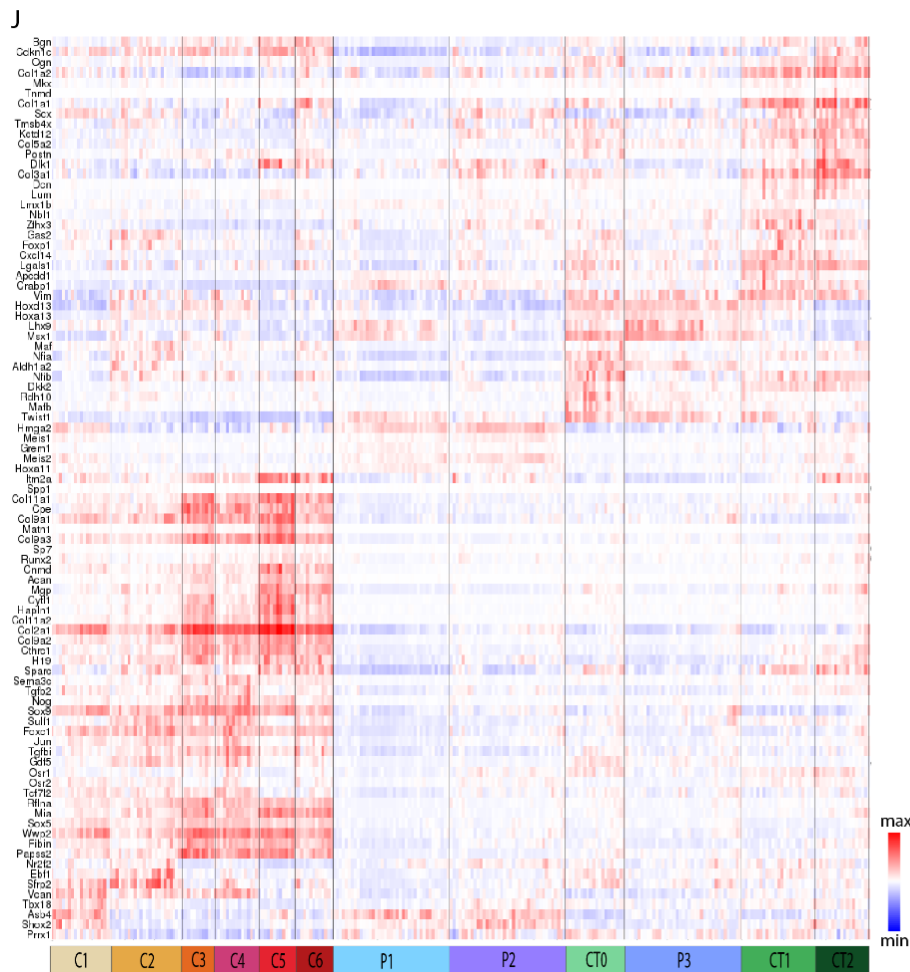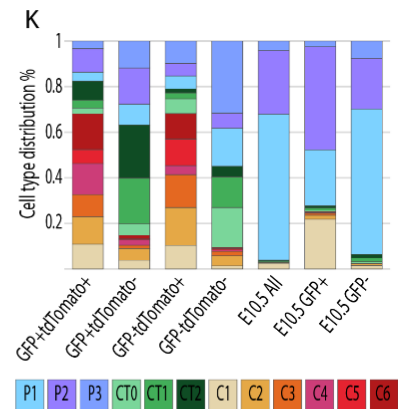

207 **Figure S1. Single-cell RNA sequencing of mouse forelimb mesenchymal cells during**  
208 **embryonic development. Related to Figure 1.**

209 (A) Live/dead cell identification based on size (FSC-Area) and granularity (SSC-Area)  
210 gating. (B) Validation of live/dead cell gating strategy in A by DAPI staining.  
211 (C-F) Sorting strategy for isolation of single cells for MAR-seq. (C) Gating of live/dead  
212 cell based on size (FSC-A) and granularity (SSC-A). (D) Gating of single cells based on  
213 size FSC-Height versus FSC-Width. (E) Second gating for single cells based on  
214 granularity Height (SSC-H) versus Width (SSC-W). (F) Gating of tdTomato<sup>+</sup>;  
215 tdTomato<sup>+</sup>-GFP<sup>+</sup>; tdTomato<sup>-</sup>-GFP<sup>+</sup>; and tdTomato<sup>-</sup>-GFP<sup>-</sup> populations.  
216 (G-I) Quality control of 32,000 analyzed single cells from the entire study. (G) Estimated  
217 ambient noise per amplification batch (103 in total). (H) Number of Illumina reads and  
218 (I) number of UMIs per amplification batch.  
219 (J) Heatmap showing log<sub>2</sub> fold change in expression of key markers across metacells.  
220 Lower panels indicate association to cell types, color-coded as in Figure 1.  
221 (K) Comparison of cell type distribution between different sorting gates.

222 **Characterization of limb progenitors**

223 Our meta-cell analysis identified three transcriptionally distinct populations of progenitors,  
224 namely P1, proximal P2 and autopodial P3 (Fig. 2A). To gain insight into transcriptional  
225 mechanisms and molecular pathways regulating these cells, we computationally extracted  
226 annotated MCs from these three subpopulations and computed the Pearson's correlation  
227 coefficients for each pair of genes across all cells (see Methods). Hierarchical clustering of  
228 the correlation matrix (Fig. 2B; Table S3) revealed four gene modules. Module 1 was  
229 enriched for components of signaling pathways such as TGF- $\beta$ /activin and  
230 BMP (*Bmp2*, *Gdf5*, *Dlx5*, *Dlx6*, *Inhba*, *Bambi*), Wnt (*Wnt5a*) and Fgf (*Fgf12*, *Sp9*), as well  
231 as for retinoic acid synthesis enzymes (*Aldh1a2*, *Rdh10*). This module also contained  
232 several TFs that regulate limb patterning (*Msx1*, *Msx2*, *Lhx2* and *Lhx9*) as well as TFs that  
233 are essential specifically for autopod patterning, such as *Hoxa13*, *Hoxd13*, *Hoxd12*,  
234 *Tfap2a*, and *Tfap2b* (Shen et al., 1997; Zhao et al., 2011), thus representing an autopodial  
235 genetic program. Module 2 was enriched with genes involved in matrix formation (*ccdc80*,  
236 *Lox*, *Eln*) and calcium binding proteins (*Egfl6*, *Sned1*, *Sparc*, *Piezo2*) as well as with Wnt

237 signaling components *Dkk2* and *Fzd8*. These results suggest that this module represents a  
238 progressive stage of cell differentiation.

239 Module 3 was enriched for several signaling pathways, such as Wnt (*Rspo4*) and BMP  
240 (*Grem1*), and a subset of homeobox genes including *Hoxd4*, *Hoxd8*, *Hoxd9*, *Hoxa11*, and  
241 *Shox2*. Interestingly, this module was also enriched with genes associated with the  
242 maintenance of pluripotency and stem cell function, including *Igdcc3*, *Sall4*, *Lin28b*,  
243 *Tfapc2* and *Trim71*, suggesting that this module represents a stemness genetic program  
244 (Chang et al., 2012; Melton et al., 2010; Pastor et al., 2018; Patterson et al., 2011; Rybak  
245 et al., 2009; Wang et al., 2006; Worringer et al., 2014; Yu et al., 2007; Zhang et al., 2006,  
246 2016; Zhao et al., 2011). Module 4 was enriched for signaling pathways such as Igf  
247 (*Igf2*, *Igfbp5*, *Igfbp3*, *Igf1*) and Wnt (*Ror1*, *Dact1*). Additionally, it contained proximally  
248 expressed genes such as *Meis1*, *Meis2*, *Pkdcc*, *Meox1*, *Pitx2*, *Emx2*, and *Irx3*, thus  
249 representing a proximal gene program (Campbell et al., 2012; Delgado et al., 2020; Li et  
250 al., 2014; Mercader et al., 1999b, 2009; Pellegrini et al., 2001; Probst et al., 2011; Reijntjes  
251 et al., 2007; Vickerman et al., 2011). Interestingly, module 4 also contained genes  
252 associated with tendon and connective tissue formation, such as *Scx*, *Tcf15*, *Osr2* and  
253 *Cxcl12* (Nassari et al., 2017b; Wilson-Rawls et al., 2004).

254 We next examined the temporal activity of these four modules (Fig. 2C). Results showed  
255 that 8% of the autopodial module 1 gene expression came from E10.5 cells, 12% from  
256 E11.5 cells and 25-27% from E12.5-E14.5 cells. These results suggest that autopodial gene  
257 program is detectable already at E10.5 cells and becomes more prominent at E12.5-E14.5.  
258 In module 2, 8% of the gene expression was associated to E10.5 cells, with constantly  
259 increasing contribution at later developmental stages (15% at E11.5, 19% at E12.5, 24% at  
260 E13.5, and 34% at E14.5), suggesting that this module represents a late genetic program.  
261 In the stemness module 3, 45% of gene expression was associated to E10.5 cells, followed  
262 by a decline in contribution at later stages (28% at E11.5, 12% at E12.5, 8% at E13.5, and  
263 6% at E14.5). These results indicate that cells turn off the expression of stemness genes as  
264 development proceeds. In the proximal module 4, gene expression was associated mostly  
265 to E10.5 and E11.5 cells (27% and 26%, respectively), whereas E12.5-E14.5 cells  
266 contributed 16%, 14%, and 16%, respectively. These results suggest that proximal genes  
267 are expressed by cells throughout this period.

268 Next, we utilized our gene module information to classify the three identified progenitor  
269 populations. To determine how these functional gene modules are distributed across cell  
270 types, we calculated scores of each module for each MC. Examination of proximal (4) vs  
271 autopodial (1) module scores showed that MCs of proximal P2 and autopodial P3 were  
272 completely separated (Fig. 2D). P2 was enriched with proximal module genes, whereas P3  
273 was enriched with autopodial module genes, further confirming our annotation.  
274 Interestingly, P1 MCs had low levels of both proximal and autopodial scores, with some  
275 MCs overlapping with proximal or autopodial MCs. The location of P1 MCs between P2  
276 and P3 with some overlap suggests that P1 MCs transit into proximal and autopodial  
277 progenitor states.

278 P1 MCs had higher levels of expression of the stemness module (3) scores, as compared to  
279 P2 and P3, which expressed intermediate and high expression of the late module (1) scores,  
280 respectively (Fig. 2E), further supporting the naïve state of P1. Finally, examination of  
281 proximal and stemness scores showed a clear separation between the three progenitor  
282 groups. P1 was characterized by high-to-intermediate stemness score combined with low  
283 proximal scores, whereas P2 was characterized by intermediate stemness scores combined  
284 with high proximal scores. P3 displayed the lowest levels of both proximal and stemness  
285 scores (Fig. S2A,B).

286 Overall, these results classify limb progenitors as proximal, autopodial and naïve, and  
287 uncover TFs and signaling circuits that regulate these populations. Temporally, we show  
288 that proximal and autopodial gene modules are active throughout the developmental  
289 process. Additionally, a transition from stemness to late genetic program was observed.

290 To reveal the spatial distribution of these progenitors *in vivo*, we searched for specific  
291 markers for the three progenitor populations. For that, we first analyzed the most  
292 differentially expressed genes between proximal and autopodial progenitors (Table S4). As  
293 shown in Fig. 2F,G and Table S4, *Shox2* and the known proximal markers *Meis1* and *Meis2*  
294 were upregulated in proximal progenitors, while *Tfap2b*, *Hoxd13*, *Hoxa13* and *Msx1* were  
295 among the most differentially expressed genes in the autopodial progenitors. We selected  
296 *Shox2* and *Hoxd13* as markers for our *in situ* experiments due to the higher expression  
297 levels of these two genes. Naïve progenitors displayed significantly lower levels of *Hoxd13*  
298 (1.3 fold,  $p = 10.7 -\log_{10}$ ; Table S5). Comparison of gene expression between naïve and

299 proximal subpopulations showed that *Msx1* was among the most differentially expressed  
300 genes by P1 cells (Fig. 2H; Table S6). Because *Msx1* was also expressed by P3 cells, we  
301 examined the combination of *Msx1* and *Hoxd13*. As seen in Fig. 2I, this combination  
302 clearly separated between P1 and P3 MCs. Thus, we defined *Msx1*<sup>+</sup>/*Hoxd13*<sup>-</sup> cells as naïve  
303 progenitors, *Shox2*<sup>+</sup> cells as proximal progenitors and *Msx1*<sup>+</sup>/*Hoxd13*<sup>+</sup> as autopodial  
304 progenitors.

305 To study the spatiotemporal distribution of the three progenitor populations during limb  
306 development, we conducted whole-limb triple *in situ* hybridization chain reaction (HCR)  
307 using *Msx1*, *Shox2* and *Hoxd13* probes. As seen in Fig. 2J, at E10.5, *Msx1* was expressed  
308 in the outer margin of the limb forming an arc-like pattern along the anterior-posterior axis.  
309 The arc extended both dorsally and ventrally from the AP midline, more so dorsally (Fig.  
310 S2C-E). At the anterior-proximal side of the arc, *Msx1* expression domain was the widest  
311 (Fig. 2J, Fig. S2F,G). At the dorsal side, the most posterior *Msx1* expression domain  
312 overlapped with *Hoxd13* expression domain, demarcating the location of the autopodial  
313 progenitors (Fig. 2J, Fig. S2H,I). *Shox2* proximal progenitors were found at the core of the  
314 limb bud, encircled by the *Msx1* expression domain.

315 At E11.5 (Fig. 2K, Fig. S2J-P), the arc-like pattern of *Msx1* expression along the AP axis  
316 was maintained, as were the size asymmetries along the AP and DV axes. The overlap  
317 between *Msx1* and *Hoxd13* expression domains expanded dorsally and ventrally as well as  
318 anteriorly, occupying the most distal front of the limb. *Shox2* expression domain extended  
319 throughout most of the proximal limb segment.

320 At E12.5 (Fig. 2L), *Msx1* arc-like expression domain was still visible. *Msx1* and *Hoxd13*  
321 expression domains occupied the interdigital space and most of the outer margin of the  
322 autopod, with the exception of the anterior region of the developing thumb and a small  
323 posterior region, which were positive only for *Msx1* (Fig. S2Q-R). *Shox2* expression  
324 domain occupied most of the proximal limb segment. Areas of overlap between *Shox2* and  
325 *Msx1* and between *Msx1* and *Hoxd13* were observed for several days, supporting the  
326 transition of P1 cells into either P2 or P3 cells, as suggested by our analysis.

327 Together, these data suggest that P1 represents naïve multipotent progenitor cells, which  
328 are marked by *Msx1* and are located in the outer margin of the forming limb. These cells  
329 differentiate into P2 proximal progenitors, marked by *Shox2*, and P3 autopodial  
330 progenitors, which are co-marked by *Msx1* and *Hoxd13*. Another important finding is the  
331 co-existence of P2 and P3 cells at E10.5-E12.5, which suggests that during this time  
332 window, P1 cells transit progressively and simultaneously into P2 and P3 cells.

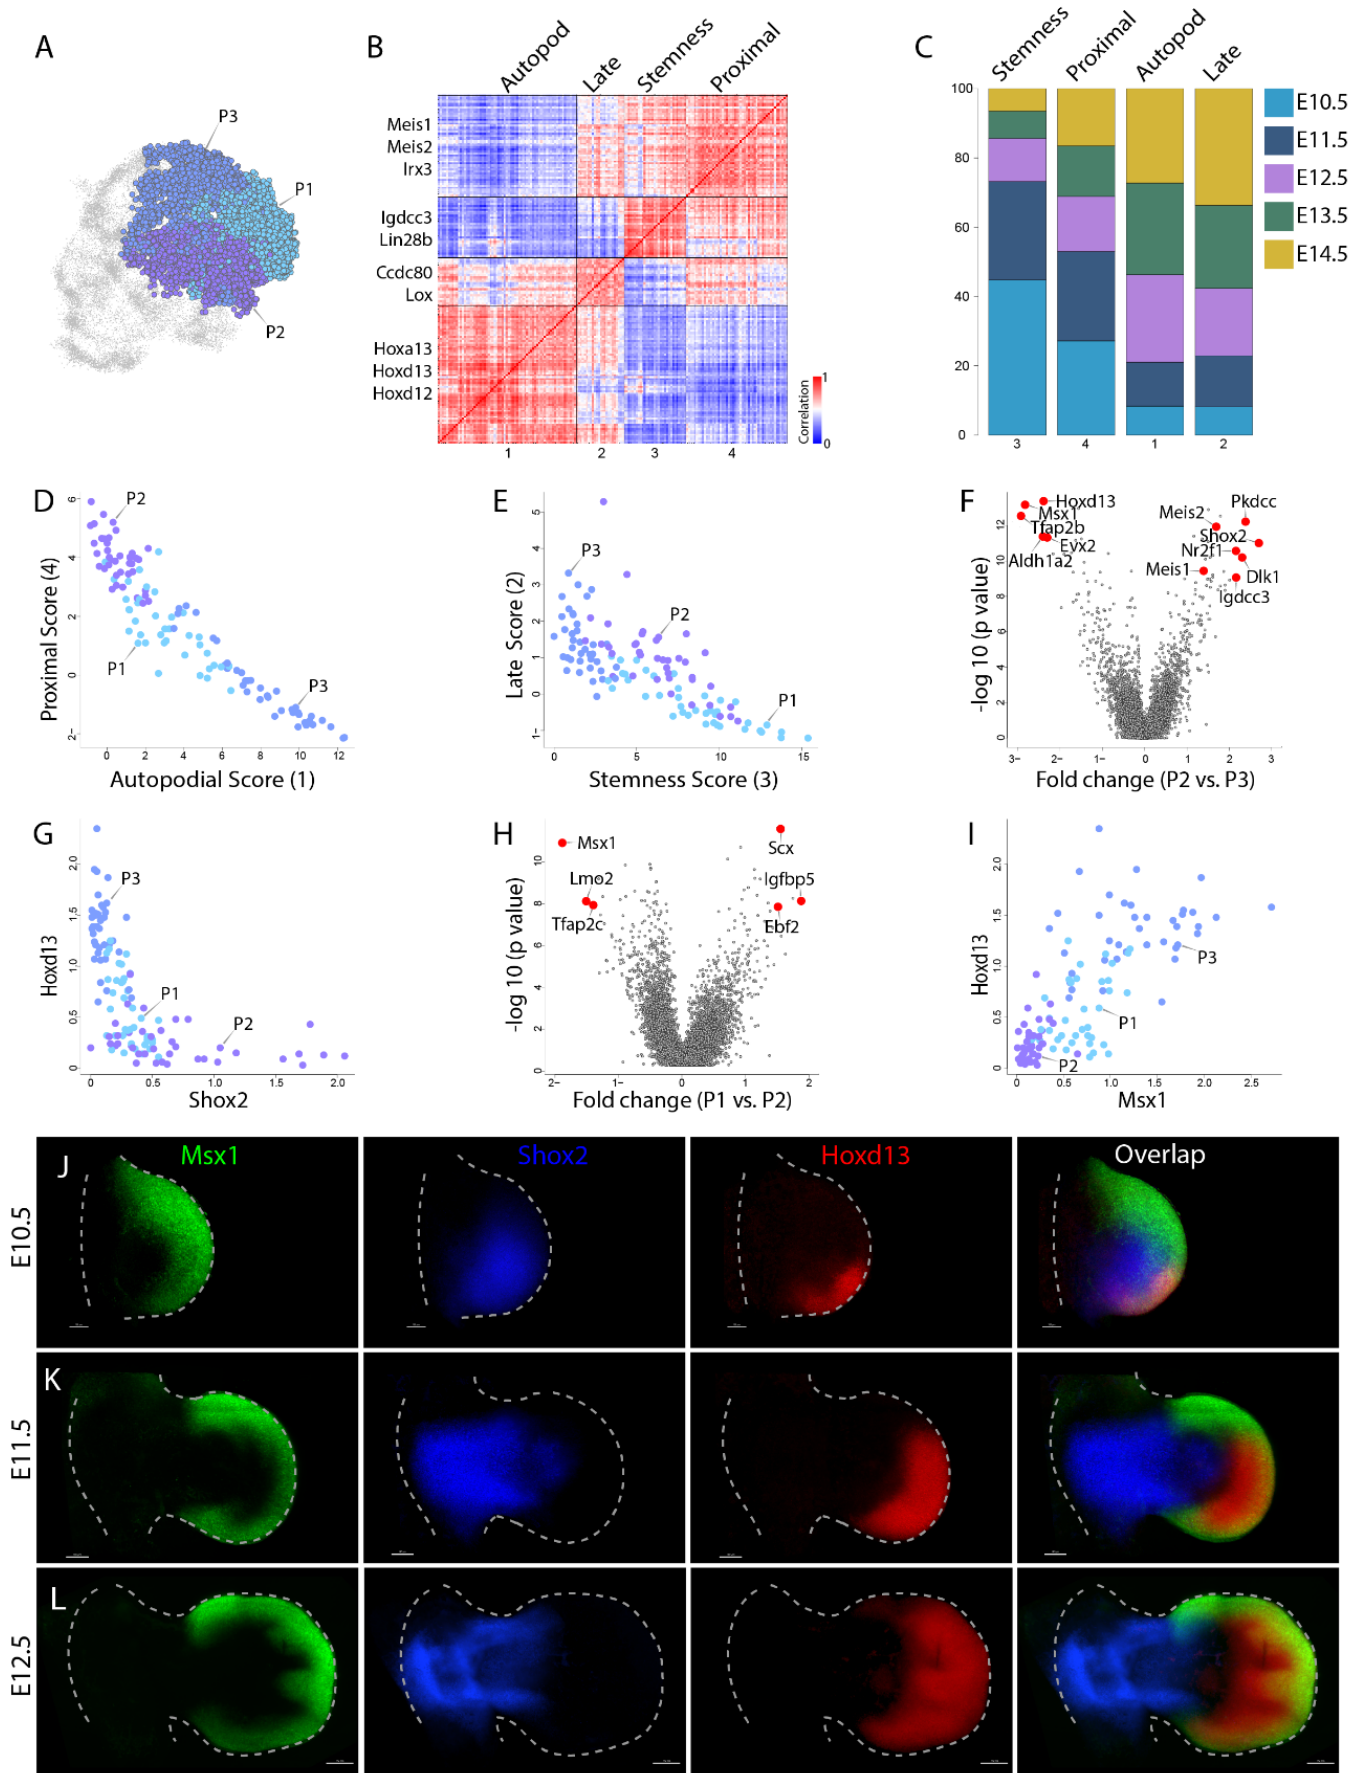

333 **Figure 2. Characterization of mesenchymal progenitor cells**



334 (A) *k*-NN graph of 10,241 progenitor cells, grouped into three subsets. Dots represent  
335 single cells, which were annotated and color-coded as in Figure 1B. (B) Heatmap showing  
336 hierarchical clustering of 175 genes that were most variably expressed by progenitor cells  
337 into four modules, based on gene-gene Pearson's correlation. Representative genes are  
338 indicated for each gene module. (C) Graph showing the relative contributions of cells at  
339 various developmental stages to the total gene expression in each module. (D) Scatter plot  
340 showing the distribution of autopodial (*X*-axis) and proximal (*Y*-axis) scores in progenitor  
341 metacells. (E) Scatter plot showing the distribution of stemness (*X*-axis) and late (*Y*-axis)  
342 scores in progenitor meta-cells. (F) Volcano plot showing differentially expressed genes  
343 between P2 and P3 cells, presented as expression fold change (*X*-axis) and *p*-value (*Y*-axis,  
344  $-\log_{10}$  scale). The five most significantly differentially expressed genes and the two  
345 established proximal markers *Meis1* and *Meis2* are indicated by red dots. (G) Scatter plot  
346 showing the differences in *Shox2* (*X*-axis) and *Hoxd13* (*Y*-axis) expression across  
347 progenitor metacells. (H) Volcano plot showing differentially expressed genes between P1  
348 and P2 cells, presented as expression fold change (*X*-axis) and *p*-value (*Y*-axis,  $-\log_{10}$   
349 scale). The three most significantly differentially expressed genes are indicated by red  
350 dots. (I) Scatter plot showing the differences in *Msx1* (*X*-axis) and *Hoxd13* (*Y*-axis)  
351 expression across progenitor metacells. (J-L) Maximum intensity projection (MIP) images  
352 of E10.5 (K), E11.5 (L) and E12.5 (M) whole-mount forelimbs stained for *Msx1* (green),  
353 *Shox2* (blue) and *Hoxd13* (red) mRNA using *in situ* HCR and imaged by light sheet  
354 microscopy. *Msx1* is expressed at the anterior-posterior margin of the limb in an arc-like  
355 pattern that is wider at the anterior side. *Hoxd13* expression expanded from a small dorsal  
356 posterior region at E10.5 to occupy most of the autopod at E12.5. *Shox2* is expressed in the  
357 proximal limb, stylopod and zeugopod. At each stage, *n*=2.

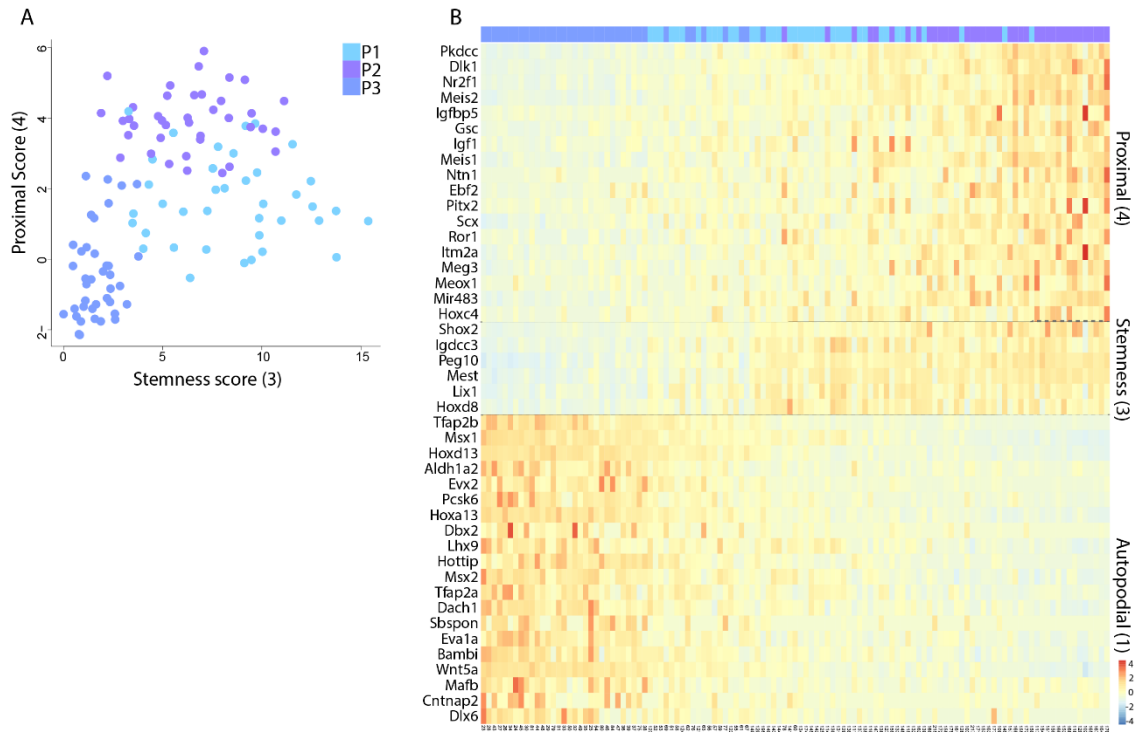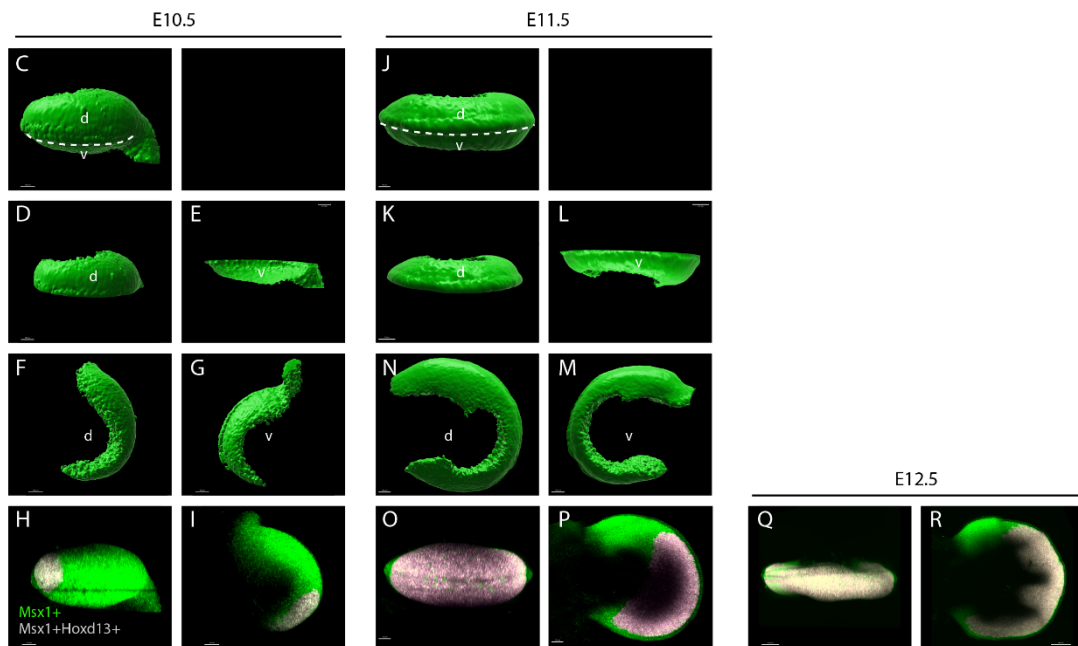

358 **Figure S2. Characterization of mesenchymal progenitor cells. Related to Figure 2.**  
 359 (A) Scatter plot showing the distribution of stemness (*X*-axis) and proximal (*Y*-axis)  
 360 scores in progenitor metacells.

361 (B) Heatmap showing log<sub>2</sub> fold change in expression of a subset of proximal, autopodial  
362 and stemness module genes in progenitor metacells.  
363 (C-G) 3D-segmented and rendered views of the outer surface of *Msx1* mRNA expression  
364 domain in E10.5 whole-mount forelimb imaged by light sheet microscopy. (C) Frontal  
365 view; dashed white line indicates the plane of optical section in D and E. (D) Dorsal and  
366 (E) ventral halves of *Msx1* expression domain show that it extends dorsally and ventrally  
367 from the AER midline, and that the dorsal side is wider than the ventral. (F) Dorsal and  
368 (G) ventral views show the arc-like shape of *Msx1* expression domain and the width  
369 differences between the proximal-anterior and proximal-posterior sides.  
370 (H,I) Maximum intensity projection (MIP) of *Msx1* and *Hoxd13* mRNA coexpression  
371 domain in E10.5 whole-mount forelimb, imaged by light sheet microscopy.  
372 (J-N) 3D-segmented and rendered views of the outer surface of *Msx1* mRNA expression  
373 domain in E11.5 whole-mount forelimb imaged by light sheet microscopy. (J) Frontal  
374 view; dashed white line indicates the plane of optical section in K and L. (K) Dorsal and  
375 (L) ventral halves of *Msx1* expression domain show that it extends dorsally and ventrally  
376 from the AER midline, and that the dorsal side is wider than the ventral. (N) Dorsal and  
377 (M) ventral views show the arc-like shape of *Msx1* expression domain and the width  
378 differences between proximal-anterior and proximal-posterior sides.  
379 (O-R) MIP of *Msx1* and *Hoxd13* mRNA coexpression domain in E11.5 (O,P) and E12.5  
380 (Q,R) whole-mount forelimbs, imaged by light sheet microscopy.  
381 d, dorsal; v, ventral.

### 382 ***Msx1* marks the naïve progenitors of the limb**

383 A central hypothesis raised by our single-cell data is that the transcription factor *Msx1*  
384 marks the most naïve limb mesenchymal progenitors. If indeed this is the case, this TF  
385 should be expressed at the onset of limb development and its lineage should give rise to all  
386 mesenchyme-derived tissues, including cartilage, tendon and muscle connective tissue. To  
387 test this prediction, we first studied the expression of *Msx1* at E9.5, the onset of limb  
388 development. As seen in Figure 3A and in agreement with previous studies (Coudert et al.,

389 2005), *Msx1* expression was observed in the cells of the forming forelimb. To examine  
390 directly the contribution of the *Msx1* lineage to the different mesenchymal limb tissues, we  
391 utilized the previously described *Msx1-CreER<sup>T2</sup>* knock-in mouse line (Lallemand et al.,  
392 2013) crossed with *Rosa26-tdTomato* (Madisen et al., 2010) and *Scx-GFP* (Pryce et al.,  
393 2007) mice. As seen in Figure 3B-F, a single dose of tamoxifen at E9.5 marked cells of the  
394 entire skeleton, tendons and muscle connective tissue in the E14.5 forelimb. These results  
395 confirm our single-cell data showing that *Msx1* marks the naïve multipotent mesenchymal  
396 progenitors. Moreover, they confirm the high efficiency of the *Msx1-CreER<sup>T2</sup>* knock-in  
397 allele in activating the *Rosa26-tdTomato* reporter.

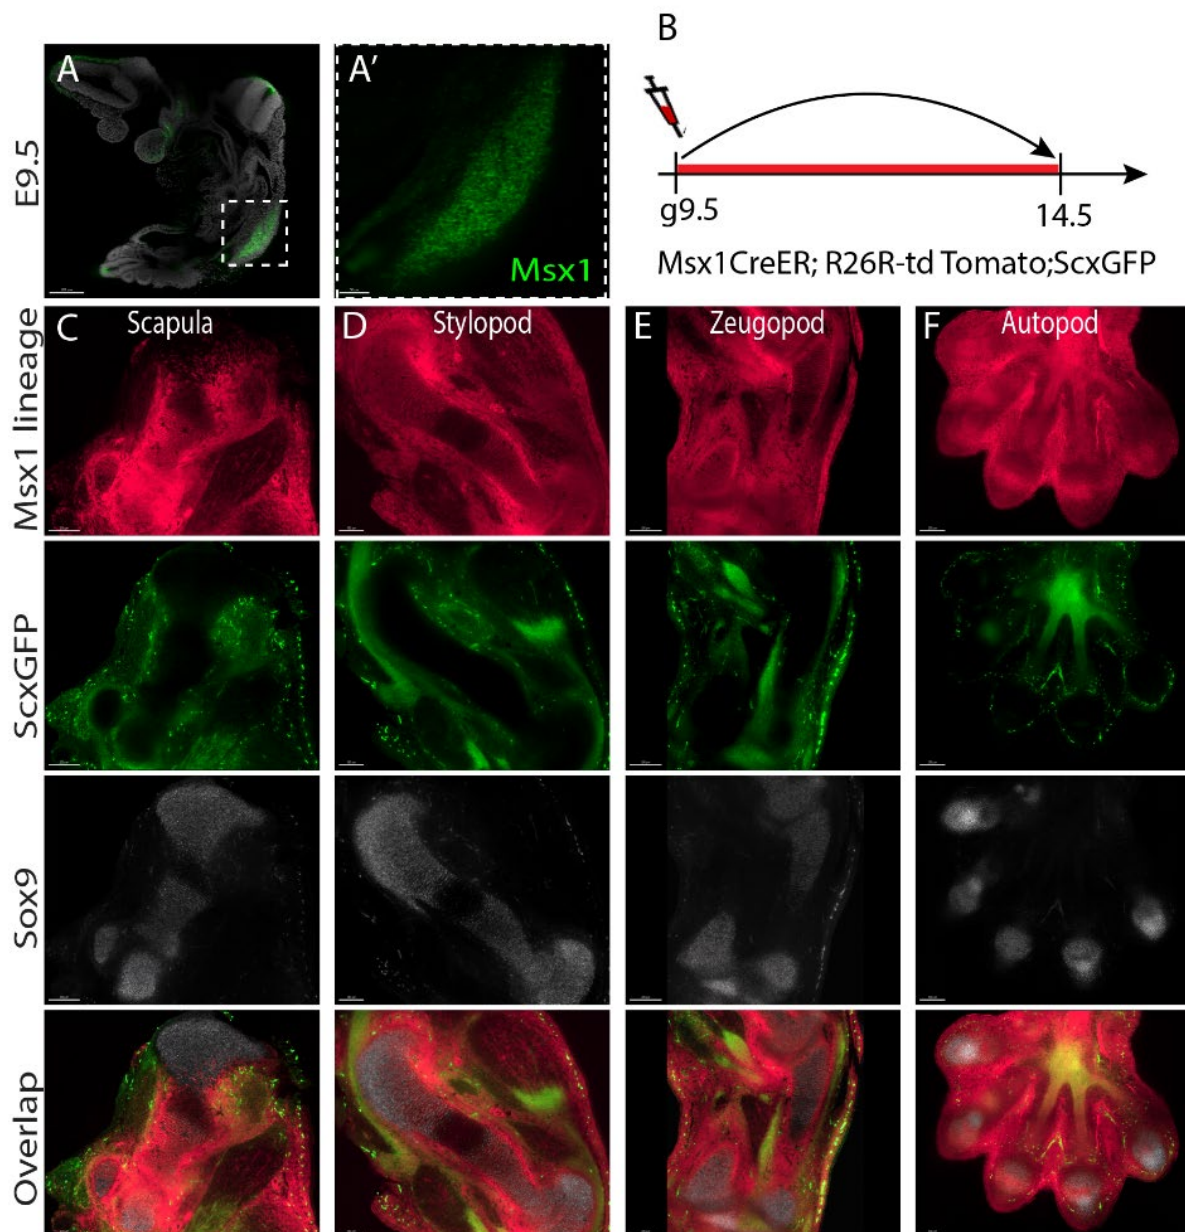

398 **Figure 3. *Msx1* marks the naïve progenitors of the limb**

399 (A) Optical section through E9.5 embryo stained for *Msx1* mRNA (green) using *in*  
400 *situ* HCR, counterstained with DAPI (grey) and imaged by light sheet microscopy. Dashed  
401 white square demarcates the forelimb. (A') Magnification of dashed white square in A  
402 shows that at E9.5, *Msx1* is expressed throughout the forelimb mesenchyme (n=2).

403 (B) Scheme showing the design of the pulse-chase cell lineage experiment. *Msx1*<sup>+</sup> cells  
404 were marked at E9.5 by administration of a single dose of tamoxifen to *Msx1*-  
405 *CreER*<sup>T2</sup>; *Rosa26-tdTomato*, *Scx-GFP* pregnant females (g, gavage). The contribution of  
406 *Msx1* lineage to the limb tissues was examined at E14.5. (C-F) Optical sections through  
407 scapula (C), stylopod (D), zeugopod (E) and autopod (F) show that at E14.5, descendants  
408 of E9.5 *Msx1*<sup>+</sup> cells (pink) contribute to all mesenchyme-derived tissues of the forelimb  
409 and most of the scapula, including tendons (green, visualized by *Scx-GFP*), cartilage (grey,  
410 visualized by *in situ* HCR staining of *Sox9* mRNA), muscle connective tissue and  
411 perichondrium (n=3). Whole forelimbs were imaged by light sheet microscopy.

412 Our single-cell data suggested that during developmental, *Msx1* naïve progenitors  
413 progressively transition into proximal and autopodial progenitors. To demonstrate this  
414 process *in vivo*, we combined sequential pulse-chase genetic lineage tracing, using the  
415 *Msx1-CreER*<sup>T2</sup>; *Rosa26-tdTomato* mice, with whole-mount *in situ* HCR for *Msx1*. By  
416 applying sequential short (30 h) chase periods, we could follow the temporal dynamics of  
417 *Msx1* cell differentiation, whereas *in situ* HCR provided the position of the *Msx1* naïve  
418 progenitors at the end of the chase. Differences in position between *Msx1*<sup>+</sup> naïve  
419 progenitors and their descendants would provide spatiotemporal information on the  
420 progression of this process. To demonstrate the transition of *Msx1*<sup>+</sup> naïve progenitors to  
421 proximal progenitors we performed HCR for *Shox2*, which marks the latter cells.

422 At E10.5, while restricted *Msx1* expression was observed at the outer margin of the limb  
423 along the anterior-posterior axis, tdTomato signal was detected throughout the limb,  
424 including in *Msx1*<sup>+</sup> cells. *Shox2* expression was observed in *tdTomato*<sup>+</sup>*Msx1*<sup>-</sup> cells, which  
425 were surrounded by *tdTomato*<sup>+</sup>*Msx1*<sup>+</sup> cells (Figure 4A). These results indicate that at that  
426 stage, some of the pulsed cells maintained their naïve state, mostly at the margin of the  
427 limb, whereas the center was occupied by *Msx1* lineage cells that had lost their naïve state

428 and adopted a new fate, some as proximal progenitors. At E11-E11.5, *Msx1* expression in  
429 the outer margin of the limb was maintained, whereas tdTomato-expressing cells were  
430 found in the anterior proximal domain but not in the proximal posterior domain. *Shox2*  
431 expression was observed in the center of the limb, overlapping the tdTomato signal except  
432 at the posterior side. These results demonstrate the transition of *Msx1* naïve progenitors  
433 into proximal progenitors between E10.5 and E11.5 (Fig.4B-C). At E12.5, *Msx1*  
434 expression was observed in the autopod margin and interdigital space, demarcating  
435 metacarpals 2-5. tdTomato-expressing cells were found in the autopod margin and a few  
436 in the anterior proximal domain. *Shox2* expression was observed in the proximal limb,  
437 stylopod and zeugopod, where the anterior and posterior sides adjacent to the autopod  
438 overlapped partially with the tdTomato signal (Fig. 3D), demonstrating that the transition  
439 from *Msx1* naïve progenitors into proximal progenitors was still taking place between  
440 E11.5 and E12.5. Expression of *Msx1* also by autopodial P3 progenitors raised the  
441 possibility that proximal P2 cells are derived from P3 as well. However, P3 cells also  
442 expressed *Hoxa13*, whose lineage was previous shown to contribute only to the autopod  
443 (Scotti et al., 2015b), negating this possibility.

444 Finally, we examined the level of cell fate stability of the *Msx1*<sup>+</sup> naïve progenitors during  
445 development. For that, we compared between *Msx1*<sup>+</sup> naïve progenitors from different time  
446 points for differentially expressed genes. As seen in Fig. S3A-F, *Igdcc3*, *Asb4*, and *Hmga2*  
447 were found to be highly expressed by E10.5 and E11.5 P1 cells as compared to later stages,  
448 whereas E12.5 P1 cells displayed higher expression of the autopodial marker *Hoxd13*.  
449 Comparison between E12.5 and E13.5 P1 cells did not reveal differentially expressed  
450 genes. Overall, this analysis indicates that the naïve progenitors undergo a mild  
451 transcriptional change over time, as they largely maintain their transcriptional program.

452 Together, these results confirm and expand our single-cell data and show that *Msx1*<sup>+</sup>  
453 progenitors are the most naïve multipotent mesenchymal progenitors, which give rise to all  
454 mesenchyme-derived tissues of the limb. We demonstrated the progressive transition of  
455 *Msx1*<sup>+</sup> naïve progenitors to proximal progenitors, which takes place for several days,  
456 concomitantly with autopod development. Moreover, we showed that the addition of new  
457 proximal progenitors took place mainly on the anterior side and, to a lesser extent, on the  
458 posterior side.

459 **Figure 4. *Msx1*<sup>+</sup> naïve limb progenitors progressively differentiate into proximal or**  
460 **autopodial progenitors**

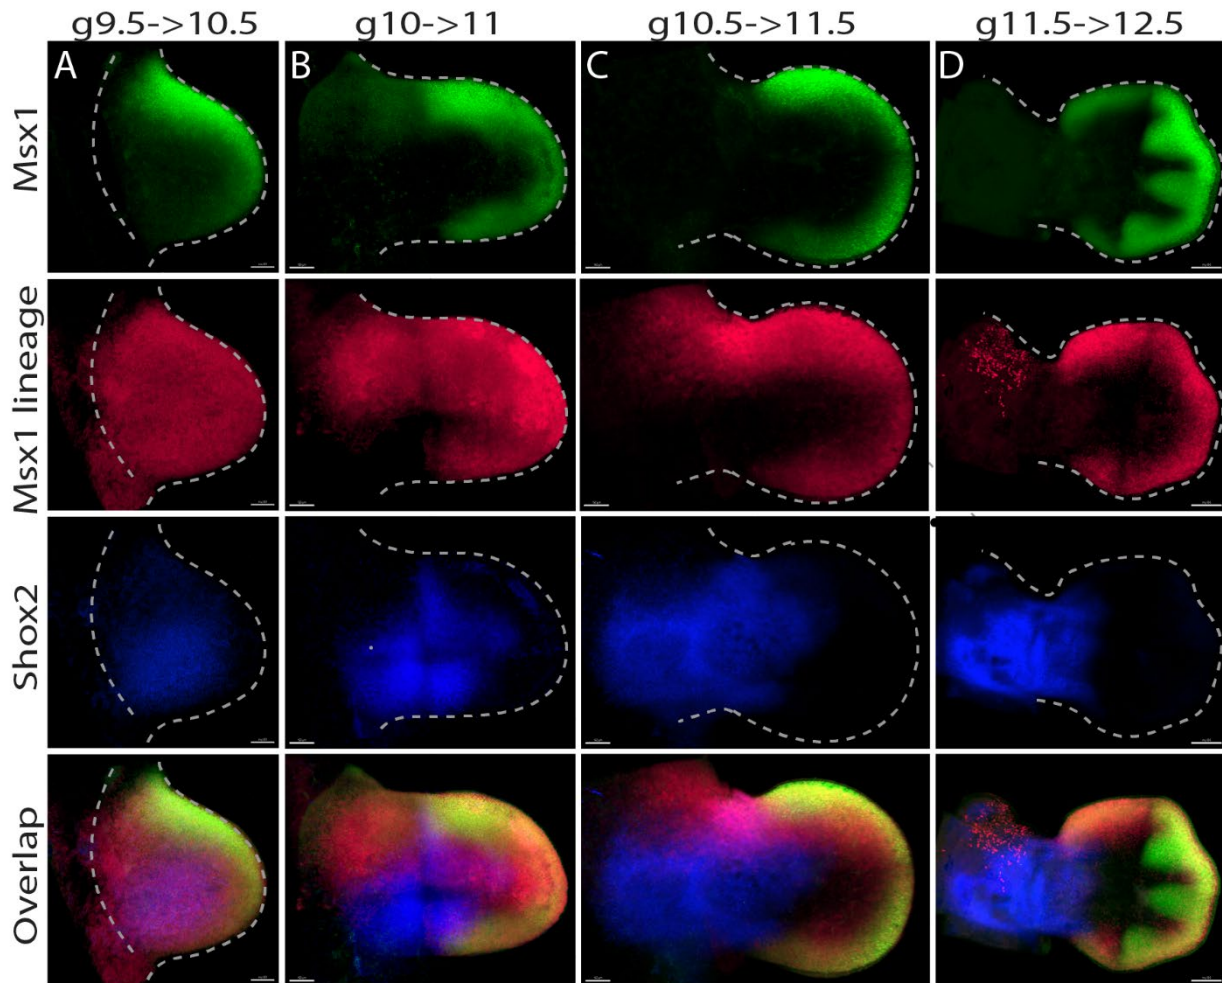

461 (A-D) Pulse-chase experiment using *Msx1-CreER<sup>T2</sup>*; *Rosa26-tdTomato* mice. *Msx1*<sup>+</sup> cells  
462 were labeled by tamoxifen administration at E9.5 (A), E10.5 (B), E11 (C) or E11.5 (D) and  
463 forelimbs were harvested 30 hours later. MIP images of whole-mount forelimbs stained for  
464 *Msx1* (green) and *Shox2* (blue) mRNA using *in situ* HCR and imaged by light sheet  
465 microscopy show that descendants of *Msx1*<sup>+</sup> cells (pink) contribute to proximal (*Shox2*<sup>+</sup>)  
466 and autopodial (*Shox2*<sup>-</sup>) limb domains progressively and concurrently. At each stage, n=2.  
467 g, gavage.





474 **Differentiation of *Msx1* lineage cells to *Sox9*<sup>+</sup> chondroprogenitors occurs**  
475 **progressively and simultaneously along the different skeletal segments**

476 Having found progressive differentiation of *Msx1*<sup>+</sup> naïve progenitors, we proceeded to  
477 study the dynamics of the differentiation of this lineage into chondroprogenitors by  
478 comparing the expression of *Msx1* to that of *Sox9*, the earliest known chondro-osteogenic  
479 marker (Akiyama et al., 2005; Bi et al., 1999; Lefebvre et al., 1997). For that, we  
480 established a chondrogenic gene module anchored to *Col2a1*, a *bona fide* chondrogenic  
481 marker (Benoit de CrombrugheU, Veronique Lefebvre and Weimin Bi, Shunichi  
482 Murakami, 2000), and used it to compute a chondrogenic score. Cells from each day were  
483 ordered by chondrogenic score and binned into 65 bins. The mean expression of *Sox9* and  
484 *Msx1* was calculated for each bin, and trend line and confidence interval were calculated  
485 (see Methods). This analysis revealed that at all sampling time points, cells with low  
486 chondrogenic score expressed high levels of *Msx1* and low levels of *Sox9*. As cells  
487 progressed through differentiation, *Sox9* expression was upregulated as expected, while  
488 *Msx1* expression was downregulated (Fig. 5A,B). To validate this, we performed *in situ*  
489 HCR for *Sox9* and *Msx1* on E10.5-E12.5 forelimbs. As seen in Figure S4A-C and in  
490 agreement with the single-cell results, the expression domains of *Msx1* and *Sox9* were  
491 mutually exclusive, with slight overlap at the borders, which likely represents the  
492 transitional stage.

493 Our data analysis indicated that the transition from *Msx1* to *Sox9* expressing cells takes  
494 place in each of the examined days, suggesting that the differentiation of *Msx1* naïve  
495 progenitors into chondroprogenitors is a progressive process. To demonstrate *in vivo* the  
496 spatiotemporal dynamics of this process, we combined sequential short (30 h) pulse-chase  
497 experiments using the *Msx1-CreER<sup>T2</sup>; Rosa26-tdTomato* mice with whole-mount *in situ*  
498 HCR for *Msx1* and *Sox9*. At E10.5, *Msx1* lineage cells populated the entire limb. *Sox9*  
499 expression was observed in the center of the limb, within a *tdTomato*<sup>+</sup>*Msx1*<sup>-</sup> domain, which  
500 was surrounded by *tdTomato*<sup>+</sup>*Msx1*<sup>+</sup> cells at the margin (Fig. 4C). Examination at E11.5  
501 showed that *Msx1* lineage cells populated most of the limb, excluding the most proximal  
502 posterior domain. *Sox9* expression domain was observed in the center of the limb.  
503 Interestingly, the *Sox9* expression domain overlapped with *tdTomato*<sup>+</sup>*Msx1*<sup>-</sup> cells along the  
504 entire forming skeleton, mostly on the anterior side (Fig. 5D,D'). *tdTomato*<sup>+</sup>*Msx1*<sup>+</sup> cells

505 were located at the autopod margin, surrounding the distal *Sox9* expression domain. At  
506 E12.5, *Msx1* lineage cells were observed at the autopod margin, with a small proximal  
507 extension on the anterior side. *Sox9* expression demarcated the humerus, radius, ulna, and  
508 five metacarpals. *Sox9* expression overlapped with *tdTomato*<sup>+</sup>*Msx1*<sup>-</sup> cells at the distal  
509 anterior radius, metacarpals 1 and 5 and tips of metacarpals 2-4. Areas of overlap between  
510 *Sox9* expression and *tdTomato*<sup>+</sup>*Msx1*<sup>+</sup> cells were detected in the lateral side of metacarpals  
511 2-4 and at all metacarpal tips (Fig. 5E,E').

512 Overall, these results support the temporally progressive differentiation of *Msx1* lineage  
513 cells not only to proximal and autopodial progenitors, but also into *Sox9*<sup>+</sup>  
514 chondroprogenitors. Moreover, this process is not restricted spatially, but rather occurs  
515 simultaneously along all segments of the developing skeleton.

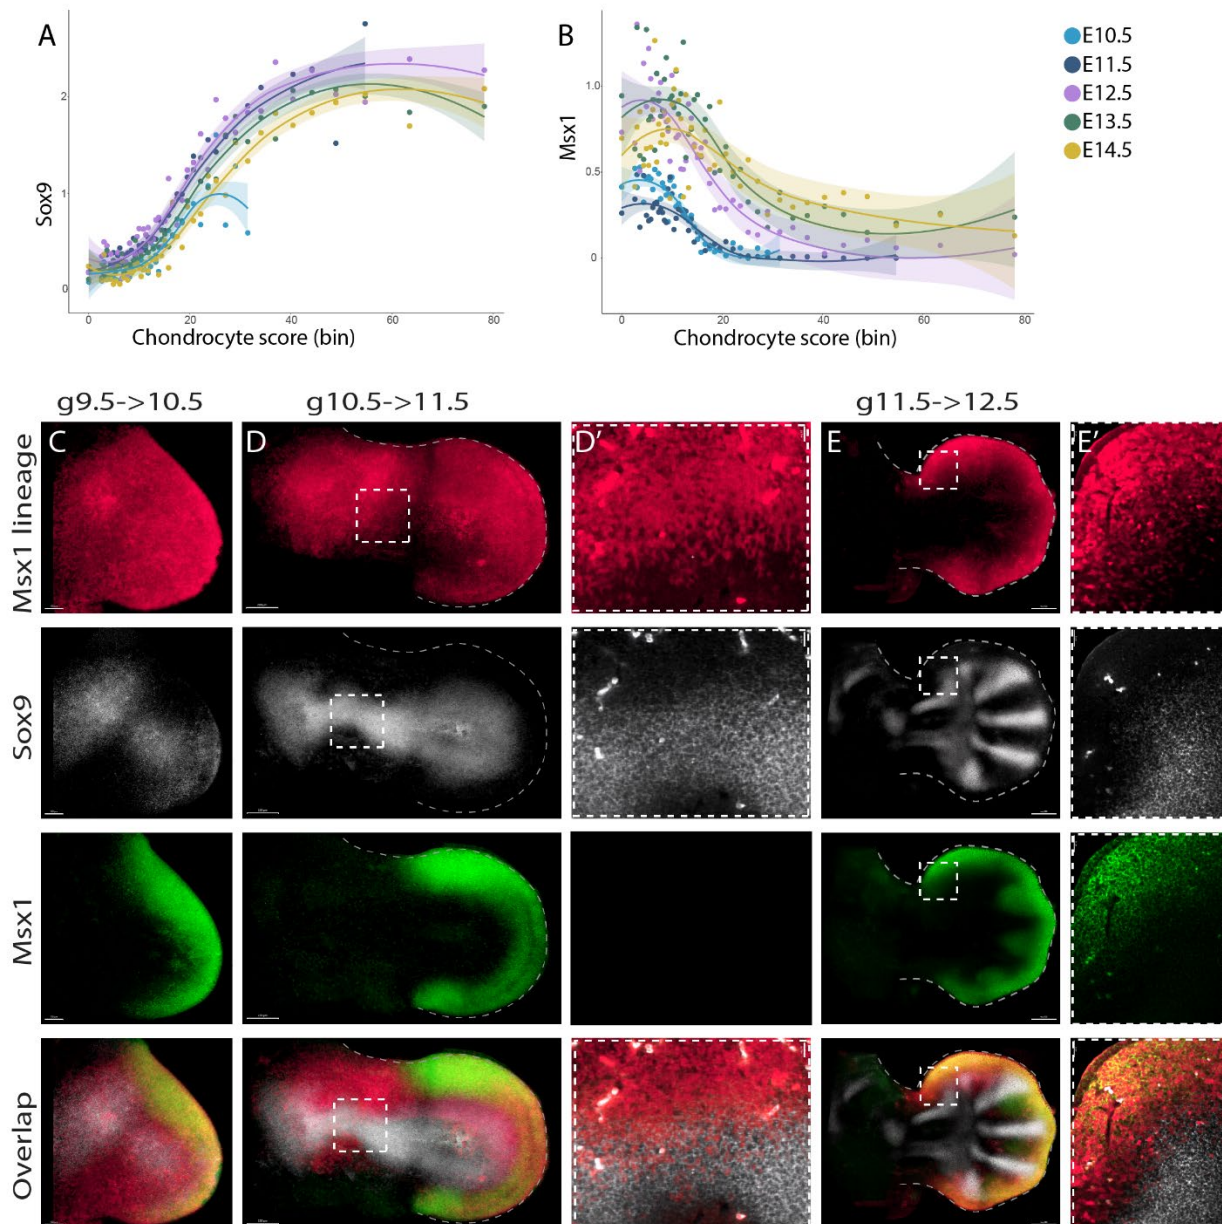

516 **Figure 5. Spatiotemporal analysis of the differentiation of *Msx1*<sup>+</sup> progenitors into**  
517 ***Sox9*<sup>+</sup> cells**

518 (A,B) Graphs showing the expression of *Sox9* (A) and *Msx1* (B) by progenitor cells and  
519 chondrocytes that were ordered by chondrogenic scores. As cells begin to differentiate into  
520 chondrocytes, *Msx1* is downregulated concurrently with *Sox9* upregulation. Marker genes  
521 for proximal and autopod limb segments, as well as the 10 most significantly differentially  
522 expressed genes, are indicated by red dots.

523 (C-E) Pulse-chase experiment using *Msx1-CreER<sup>T2</sup>; Rosa26-tdTomato* mice. *Msx1*<sup>+</sup> cells  
524 were labeled by tamoxifen administration at E9.5 (C), E10.5 (D,D') or E11.5 (E,E') and  
525 forelimbs were harvested 30 hours later. Whole-mount forelimbs were stained for *Msx1*  
526 (green) and *Sox9* (grey) mRNA using *in situ* HCR and imaged by light sheet microscopy.  
527 MIP images show that descendants of *Msx1*<sup>+</sup> cells (pink) differentiate into *Msx1*<sup>-</sup>*Sox9*<sup>+</sup>  
528 cells progressively and simultaneously in different parts of the skeleton. D' and E' are  
529 magnifications of the dashed white squares in G and H, respectively. At each stage, n=2.  
530 g, gavage.

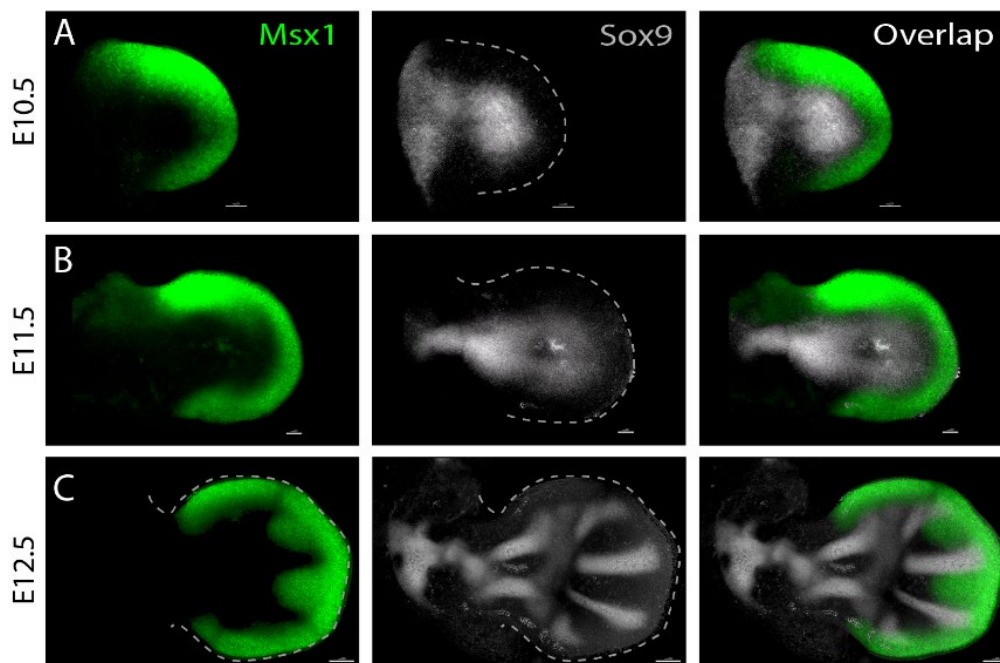

531 **Figure S4. Spatiotemporal analysis of the differentiation of *Msx1*<sup>+</sup> progenitors into**  
532 ***Sox9*<sup>+</sup> cells. Related to Figure 5.**

533 (A-C) *In vivo* validation of the opposite trend of *Msx1* and *Sox9* expression, as suggested  
534 by the single-cell data. MIP images of E10.5 (A), E11.5 (B) and E12.5 (C) whole-mount  
535 forelimbs were stained for *Msx1* and *Sox9* mRNA using *in situ* HCR and imaged by light  
536 sheet microscopy. At each stage, n=2.

537 **The skeleton forms progressively and nonconsecutively in a complex three-**  
538 **dimensional pattern**

539 Our observation that the progressive differentiation of *Msx1*<sup>+</sup> naïve progenitors to  
540 chondroprogenitors occurs simultaneously in all segments of the developing limb skeleton  
541 prompted us to reexamine the order by which these segments form. The finding that *Msx1*  
542 expression is lost once the naïve progenitors differentiate provided us with a unique  
543 opportunity to address this question. The rationale behind our approach was that the first  
544 element to form would be composed of descendants of progenitors that lost *Msx1*  
545 expression first, whereas the last element to form would be composed of descendants of  
546 progenitors that were last to lose *Msx1* expression. To follow temporally the loss of *Msx1*  
547 expression by naïve progenitors, we performed consecutive pulse-chase lineage tracing  
548 experiments by administering single doses of tamoxifen to *Msx1-CreER<sup>T2</sup>; Rosa26-*  
549 *tdTomato* mice at E9.5, E10.5, E11.5 or E12.5. To determine the exact 3D spatial  
550 distribution of tdTomato-positive cells in the forming skeleton, we cleared limbs of E13.5  
551 embryos and imaged them using light sheet microscopy.

552 As seen in Figure 6A, tamoxifen administration at E9.5 resulted in tdTomato labeling of  
553 the entire skeleton. However, pulsing at E10.5 (Fig. 6B) resulted in loss of tdTomato signal  
554 in most of the scapula, ventral humerus (Fig. S5A) and radius. tdTomato signal was  
555 observed in the acromion, humeral head and deltoid tuberosity, dorsal humerus, ulna, and  
556 in the entire autopod (Fig. 6B, Fig. S5B). Pulsing at E11.5 (Fig. 6C) resulted in loss of  
557 tdTomato signal in acromion and humeral shaft and metacarpals of digits 3 and 4 (Fig.  
558 S5C). Still, tdTomato signal was detected at the humeral head and deltoid tuberosity, radius  
559 and most of the digits. Finally, following pulsing at E12.5 (Fig. 6D), tdTomato signal was  
560 lost in the radius and metacarpals, but remained at the tips of the growing digits (Fig. S5D).  
561 These results indicated that the skeleton forms progressively in a complex pattern and not  
562 linearly along the proximal-distal axis.

563 To better understand this process, we examined in greater detail the tdTomato signal in the  
564 humerus and radius. As seen in Figures 6E,M''', in the humerus, pulsing at E10.5 led to  
565 the loss of tdTomato signal at the ventral side from head to medial epicondyle, whereas the  
566 dorsal side was tdTomato-positive from head to lateral epicondyle. Following pulsing at  
567 E11.5, the areas of the humerus that lost tdTomato signal were in the dorsal shaft and lateral

568 epicondyle, whereas the deltoid tuberosity and the dorsal side of humeral head were still  
569 tdTomato-positive (Fig. 6J-N’’’’).

570 In the radius, tamoxifen administration at E10.5 resulted in tdTomato labeling throughout  
571 the bone (Fig. 6O-S’’’’). However, pulsing at E11.5 resulted in loss of tdTomato signal in  
572 almost the entire ventral side, with few labeled cells on its distal tip (Fig. 5T). On the dorsal  
573 side, the proximal posterior side of the radius was mostly tdTomato-negative, while the  
574 anterior side still displayed extensive labeling (Fig. 6U-X’’’’). These results indicate that  
575 the ventral side of the radius forms first, followed by a diagonal AP direction of dorsal  
576 radius formation. These results demonstrate that the skeleton form in a complex pattern  
577 that extends to the level of the single element.

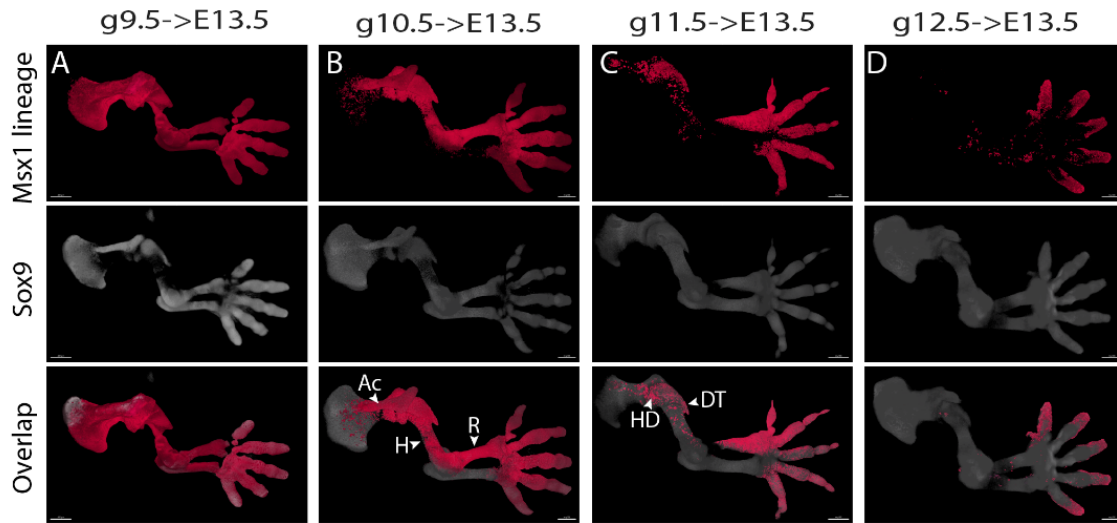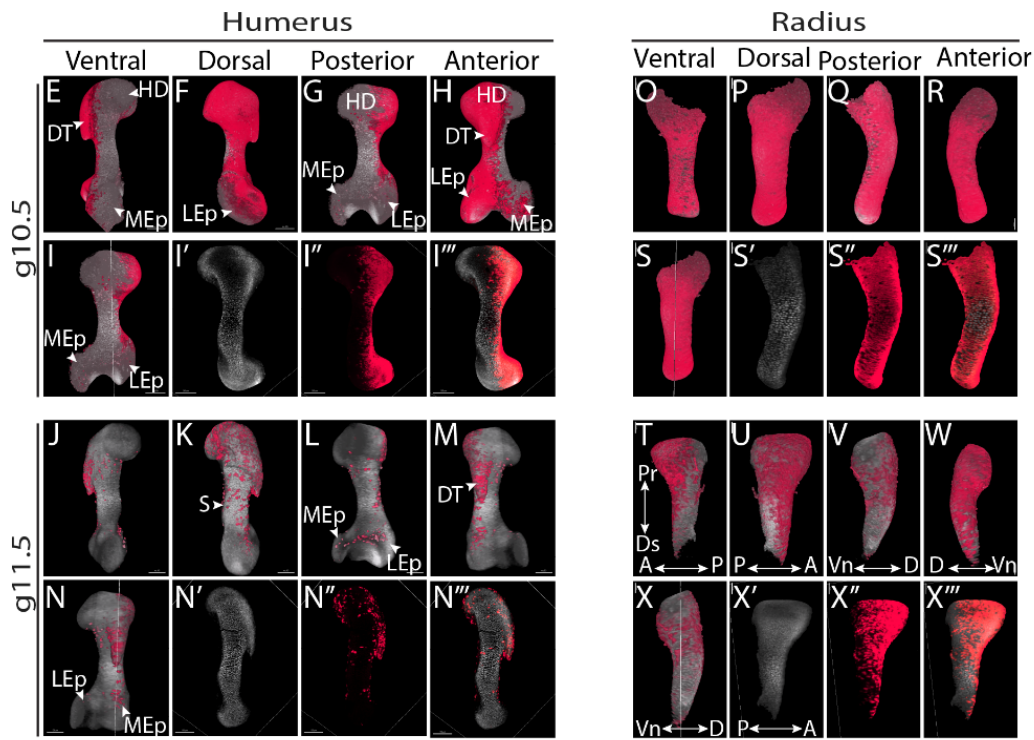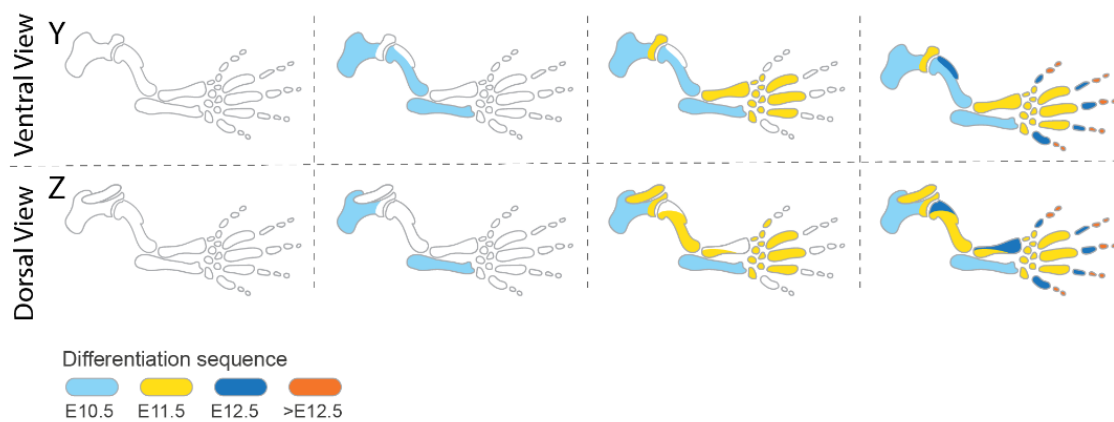

578 **Figure 6. *Msx1* lineage tracing reveals that the patterning of skeletal element deviates**  
579 **from the PD model**

580 (A-X) *Msx1*<sup>+</sup> cells were marked at consecutive days from E9.5 to E12.5 by  
581 administration of single doses of tamoxifen to *Msx1-CreER<sup>T2</sup>; Rosa26-tdTomato*  
582 pregnant females. The contribution of *Msx1* lineage cells to the limb skeleton was  
583 examined at E13.5. Whole-mount forelimbs stained with anti-SOX9 antibody (grey) and  
584 imaged by light sheet microscopy show that *Msx1* lineage (pink) contributes to skeletal  
585 formation in a complex, non-linear pattern.

586 (A-D) Dorsal view of 3D-rendered images of pulse-chase cell lineage experiment.  
587 Descendants of *Msx1*<sup>+</sup> cells marked at E9.5 (A) were detected throughout the skeleton  
588 (n=4), whereas pulsing at E10.5 (B) resulted in tdTomato signal in acromion, humerus,  
589 radius and in the autopod (n=4). Following pulsing at E11.5 (C), tdTomato signal was  
590 detected in humeral head, deltoid tuberosity, part of the radius and digits (n=3). Finally,  
591 pulsing at E12.5 (D) labeled the tips of the digits (n=2).

592 (E,J) Ventral, (F,K) dorsal, (G,L) posterior and (H,M) anterior views of 3D-rendered  
593 humerus images following pulsing at E10.5 (E-I''') and E11.5 (J-N''') show that the  
594 humeral ventral side forms first, followed by dorsal epicondyle and shaft, whereas the  
595 humeral head and deltoid tuberosity are the last to form. The locations of optical sections  
596 shown in I'-I''' and N'-N''' are indicated in I,N.

597 (O,T) Ventral, (P,U) dorsal, (Q,V) posterior and (R,W) anterior views of 3D-rendered  
598 radius images following pulsing at E10.5 (O-S''') and E11.5 (T-X''') show that the ventral  
599 side of the radius forms first, followed by formation of the dorsal side in a diagonal AP  
600 direction. The locations of optical sections shown in S'-S''' and X'-X''' are indicated in  
601 S,X.

602 (Y-Z) Schematics showing the spatiotemporal differentiation sequence in the forelimb  
603 skeleton from a ventral (Y) and dorsal view (Z).

604 Abbreviations: Ac, acromion; R, radius; H, humerus; DT, deltoid tuberosity; HD, humeral  
605 head; LEp, lateral epicondyle; MEp, medial epicondyle; S, shaft; Pr, proximal; Ds, distal;  
606 A, anterior; P, posterior; Vn, ventral; D, dorsal; g, gavage.



607 To validate the results of the *Msx1* lineage experiments, we examined the spatiotemporal  
608 dynamics of chondroprogenitor differentiation in the limb by following the induction of  
609 *Sox9* expression. For that, we used the *Sox9-CreER<sup>T2</sup>* mice, which were previously shown  
610 to efficiently drive the expression of *Rosa26-lacZ* reporter in the developing skeleton  
611 (Soeda et al., 2010). Because both our single-cell analysis and lineage studies showed that  
612 at E10.5, only part of the *Sox9* chondroprogenitors were differentiated (Fig. 6B), we  
613 decided to activate Cre activity at this time point. Thus, we administered a single dose of  
614 tamoxifen at E10.5 and harvested the limbs 30 h and 72 h afterwards. E11.5 whole-limbs  
615 were stained for *Sox9* mRNA using *in situ* HCR, whereas E13.5 whole limbs were stained  
616 for SOX9 protein and imaged using light sheet microscopy. As shown in Figure 7A-E'',  
617 tdTomato signal was observed in most of the scapula, and only on the ventral-posterior  
618 side of the humerus and ulna, whereas the radius and autopod were tdTomato-negative. At  
619 72 h post-induction (Fig.67F-J''), tdTomato labeling was seen in most of the scapula, the  
620 entire humeral shaft and ulna; however, the acromion, humeral head, deltoid tuberosity,  
621 lateral and medial epicondyles, elbow and most of the radius and digits were tdTomato-  
622 negative. These results further support the data obtained using the *Msx1-CreER<sup>T2</sup>* line,  
623 demonstrating that the skeleton forms nonconsecutively in a complex pattern that involves  
624 not only the PD axis, but also the DV and AP axes, extending to the level of the single  
625 element.

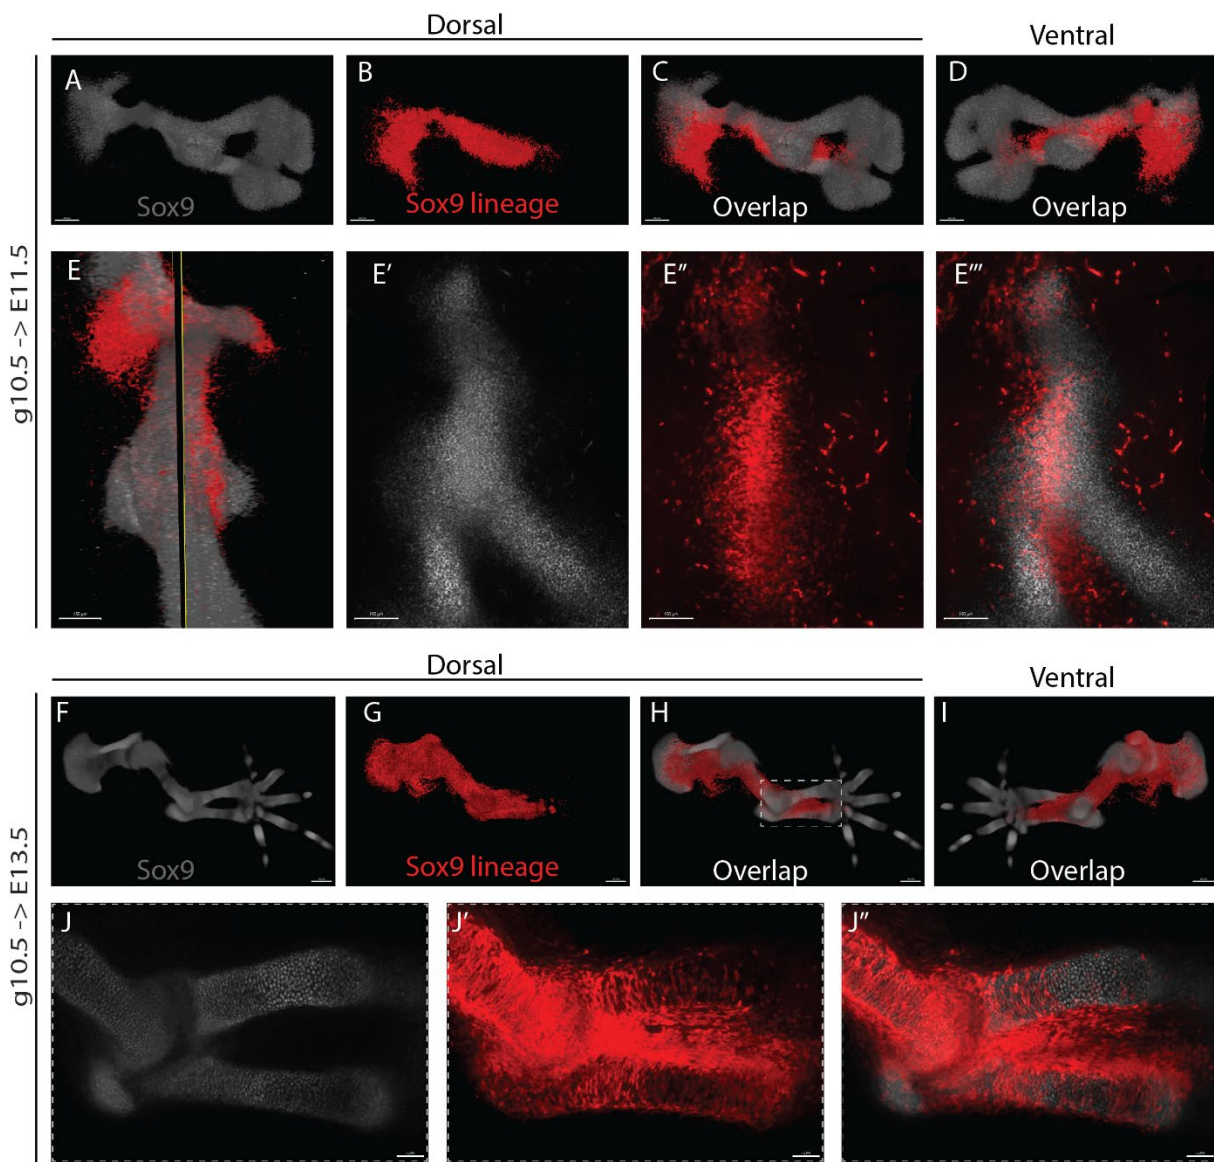

626 **Figure 7. Sox9 lineage tracing confirms that skeletal chondroprogenitor**  
627 **differentiation occurs progressively in a complex 3D pattern**

628 Pulse-chase experiment using *Sox9-CreER<sup>T2</sup>; Rosa26-tdTomato* mice. *Sox9*<sup>+</sup> cells were  
629 labeled by tamoxifen administration at E10.5 and forelimbs were harvested 30 hours later.  
630 Forelimbs were stained for *Sox9* (grey) mRNA using *in situ* HCR and imaged by light sheet  
631 microscopy. (A-D) 3D-rendered images show that pulsing of *Sox9*<sup>+</sup> cells at E10.5 results  
632 in incomplete labeling of the skeleton, demonstrating the progressive differentiation into  
633 *Sox9*<sup>+</sup> cells in a complex, non-consecutive pattern. The locations of optical sections shown

634 in E'-E'' is indicated in E. (F-I) 3D-rendered images of *Sox9-CreER<sup>T2</sup>; Rosa26-tdTomato*  
635 mice forelimbs labeled by tamoxifen administration at E10.5 and harvested 72 hours later.  
636 Forelimbs were stained for SOX9 protein (grey) and imaged by light sheet microscopy.  
637 Labeling of *Sox9*<sup>+</sup> cells at E10.5 results in incomplete labeling of the skeleton. (J-J'')  
638 Optical section through zeugopod segment (demarcated by dashed white square in H)  
639 shows that cells of the ulna upregulate *Sox9* expression prior to cells of the radius.

## 640 **DISCUSSION**

641 In this work, we revisit the long-standing question of the spatiotemporal sequence of limb  
642 development using modern molecular tools. We generated a comprehensive cellular atlas  
643 of the limb mesenchymal cell lineages during development. Using this atlas, we identified  
644 a population of naïve progenitors and their progressive and simultaneous transition into  
645 proximal and autopodial progenitors. We establish *Msx1* as a marker of naïve progenitors  
646 and localize them to the outer margin of the developing limb, along the anterior-posterior  
647 axis. We then showed that the descendants of these progenitors progressively contribute to  
648 the entire forming skeleton. Finally, temporal analysis of the differentiation of naïve  
649 progenitors revealed that the skeleton forms progressively in a complex 3D pattern, which  
650 extends to the single element level (Fig. 8).

651 Our systematic single-cell analysis of limb mesenchymal cells revealed a pool of naïve  
652 progenitors. These cells transit initially to proximal progenitors and, shortly afterwards,  
653 also to autopodial progenitors. The finding that the pool of *Msx1* naïve progenitors is  
654 maintained for several days suggests that this transition occurs progressively. These finding  
655 correspond with some aspects of previously suggested models of limb development. The  
656 existence of naïve limb progenitors and their progressive transition into progenitors of the  
657 different limb segments was suggested by the progress zone model (Saunders, 1948;  
658 Summerbell et al., 1973; Wolpert, 2002). The coexistence of the different progenitors of  
659 these segments was suggested by the early specification model, whereas the progressive  
660 and concurrent specification of proximal and distal fates is consistent with the two-signal

661 model (Mariani et al., 2008; Mercader et al., 1999a, 2000). In this respect, our findings  
662 integrate the three models.

663 Because the limb skeleton comprises three segments, it was expected to originate from  
664 three different pools of progenitors. However, in line with previous studies that failed to  
665 identify zeugopod-specific markers (Tabin and Wolpert, 2007b), we also were unable to  
666 subdivide the proximal gene program into stylopod- and zeugopod-specific. This finding  
667 raises the question of the mechanism underlying the formation of the stylopod and  
668 zeugopod as two separate segments.

669 Recently, several works studying limb development at single-cell resolution have been  
670 published (Desanlis et al., 2020a; Feregrino et al., 2019; Kelly et al., 2020). Our work is  
671 unique in that we sampled cell from the entire limb daily from E10.5 up to E14.5, providing  
672 a complete and continuous representation of cell states and transcriptional changes that  
673 take place in the limb during this critical stage of limb patterning and differentiation.

674 Our single-cell data revealed a set of markers for the three progenitor populations we  
675 identified. While *Msx1*, *Lhx9*, and *Lhx2* marked the naïve progenitors, *Msx1* lineage cells  
676 gave rise to all mesenchyme-derived limb tissues. These TFs are involved in FGF, BMP  
677 and Shh signaling, major pathways that regulate patterning along the PD, AP and DV axes  
678 (ALAPPAT et al., 2003; Bensoussan-Trigano et al., 2011; Lallemand et al., 2005, 2009;  
679 Tzchori et al., 2009; Watson et al., 2018; Yang and Wilson, 2015). Interestingly, we found  
680 that the naïve progenitors largely maintain their transcriptional program during limb  
681 development. For the proximal progenitors, we identified a set of markers that includes  
682 *Meis1* and *Meis2*, two well-known proximal markers (Capdevila et al., 1999; Delgado et  
683 al., 2020; Mercader et al., 1999b, 2009), *Shox2*, *Pkdcc* and many other genes. The validity  
684 of *Shox2* as a marker for proximal cells is supported by lineage studies showing that *Shox2*  
685 lineage gives rise to the proximal part of the limb, ending at the wrist (Sun et al., 2013).  
686 For the autopod progenitors, we identified a set of markers that included *Hoxd13*, *Hoxa13*  
687 and *Hoxd12*. These genes are expressed specifically in the autopod and play an essential  
688 role in digit identity and patterning (Desanlis et al., 2020b; Fabre et al., 2018; Fromental-  
689 Ramain et al., 1996; Knezevic et al., 1997; Scotti et al., 2015a; Sheth et al., 2007; Zákány  
690 et al., 1997). These markers were co-expressed with *Msx1*, *Msx2*, *Lhx9*, and *Lhx2*, which

691 we show to be important for autopod patterning, suggesting a functional link between these  
692 two groups of genes.

693 The identification of markers for the three progenitor populations allowed us to study their  
694 spatiotemporal distribution during limb development. As suggested by the single-cell  
695 analysis results, we found that the naïve progenitors marker *Msx1* was expressed  
696 throughout the process in an arc-like pattern along the anterior-posterior axis, as well as  
697 dorsally and ventrally away from the AER. This finding suggests that the naïve progenitors  
698 maintain their location through development. Moreover, it suggests that their progressive  
699 transition to the different lineages may not be restricted to the limb apex, but can occur  
700 along the anterior-posterior axis. Indeed, sequential pulse-chase experiments clearly  
701 showed that between E9.5 and E11.5, *Msx1* lineage cells populated extensive areas in the  
702 proximal side of the limb. Moreover, they overlapped with both proximal and autopodial  
703 progenitors. Proximal progenitors were initially located in the center and later expanded  
704 proximally, whereas autopodial progenitors were initially located distally in the posterior-  
705 dorsal side and later expanded anteriorly. We therefore suggest that the progressive  
706 transition of naïve progenitors into proximal and autopodial fates occurs along the length  
707 of the limb, allowing simultaneous transition into these identities.

708 The establishment of limb progenitor identities and their differentiation to  
709 chondroprogenitors can follow two scenarios. One possibility is that the two processes are  
710 separated temporally, such that differentiation starts only after all progenitor identities have  
711 been established. Alternatively, a progressive process of identity establishment may  
712 coincide with the differentiation of the two progenitor pools into chondroprogenitors. Our  
713 findings indicate that the differentiation of naïve *Msx1*<sup>+</sup> progenitors into  
714 chondroprogenitors is progressive and that the transition of these naïve progenitors into  
715 proximal and autopodial progenitors coincides with the differentiation of these two  
716 progenitor pools into chondroprogenitors, suggesting that these processes overlap  
717 temporally. Strong support for this possibility is our observation that at E10.5-E11.5, both  
718 *Msx1*, which marks the naïve progenitors, and *Sox9*, which marks chondroprogenitors,  
719 were expressed in the developing limb. Other pieces of evidence that are consistent with  
720 this scenario came from genetic lineage tracing analyses in mice. We previously showed

721 that different skeletal elements form progressively by continuous addition of *Sox9*<sup>+</sup> cells  
722 (Blitz et al., 2013; Eyal et al., 2019)

723 In this work, we provide several pieces of evidence to support the conclusion that *Msx1* is  
724 a marker for the naïve mesenchymal progenitors. These include our single-cell analysis  
725 and lineage tracing using *Msx1-CreER<sup>T2</sup>* mice. This knock-in allele was previously shown  
726 to drive an identical pattern of Cre expression as the endogenous *Msx1* gene (Lallemand et  
727 al., 2013). The combination of a reliable marker, mouse line and the finding that *Msx1*  
728 expression by naïve mesenchymal progenitors is lost once they differentiate provided us  
729 with a unique opportunity to study the order by which the skeleton forms. If the common  
730 view is correct and the skeleton forms in a proximal-to-distal direction, then progenitors of  
731 the proximal stylopod should be first to lose *Msx1* expression and differentiate, followed  
732 by zeugopod progenitors and, lastly, by autopod progenitors. However, the pattern that we  
733 observed was much more complex and nonconsecutive, as skeletogenesis occurred  
734 simultaneously progressing from multiple foci along the limb. This finding indicates that  
735 in addition to the formation of skeletal elements along the PD axis, there is also strong  
736 contribution along the AP and DV axes. An example for the complexity of the process is  
737 our finding that the posterior half of the humerus formed first together with ulna, whereas  
738 the anterior side of the humerus formed later together with the radius. Further support for  
739 this notion is the similar results we obtained studying the order by which the skeleton forms  
740 using the spatiotemporal elevation of *Sox9* expression in chondroprogenitors.

741 In summary, our findings suggest a new model for limb and skeleton development. At its  
742 core is the principle that limb development involves progressive and simultaneous  
743 transition of naïve limb progenitors into either proximal or autopodial progenitors, which  
744 then progressively differentiate into *Sox9*<sup>+</sup> chondroprogenitors. This process occurs  
745 simultaneously at different locations along the limb, suggesting that the skeleton forms  
746 progressively from multiple foci in a complex 3D pattern.

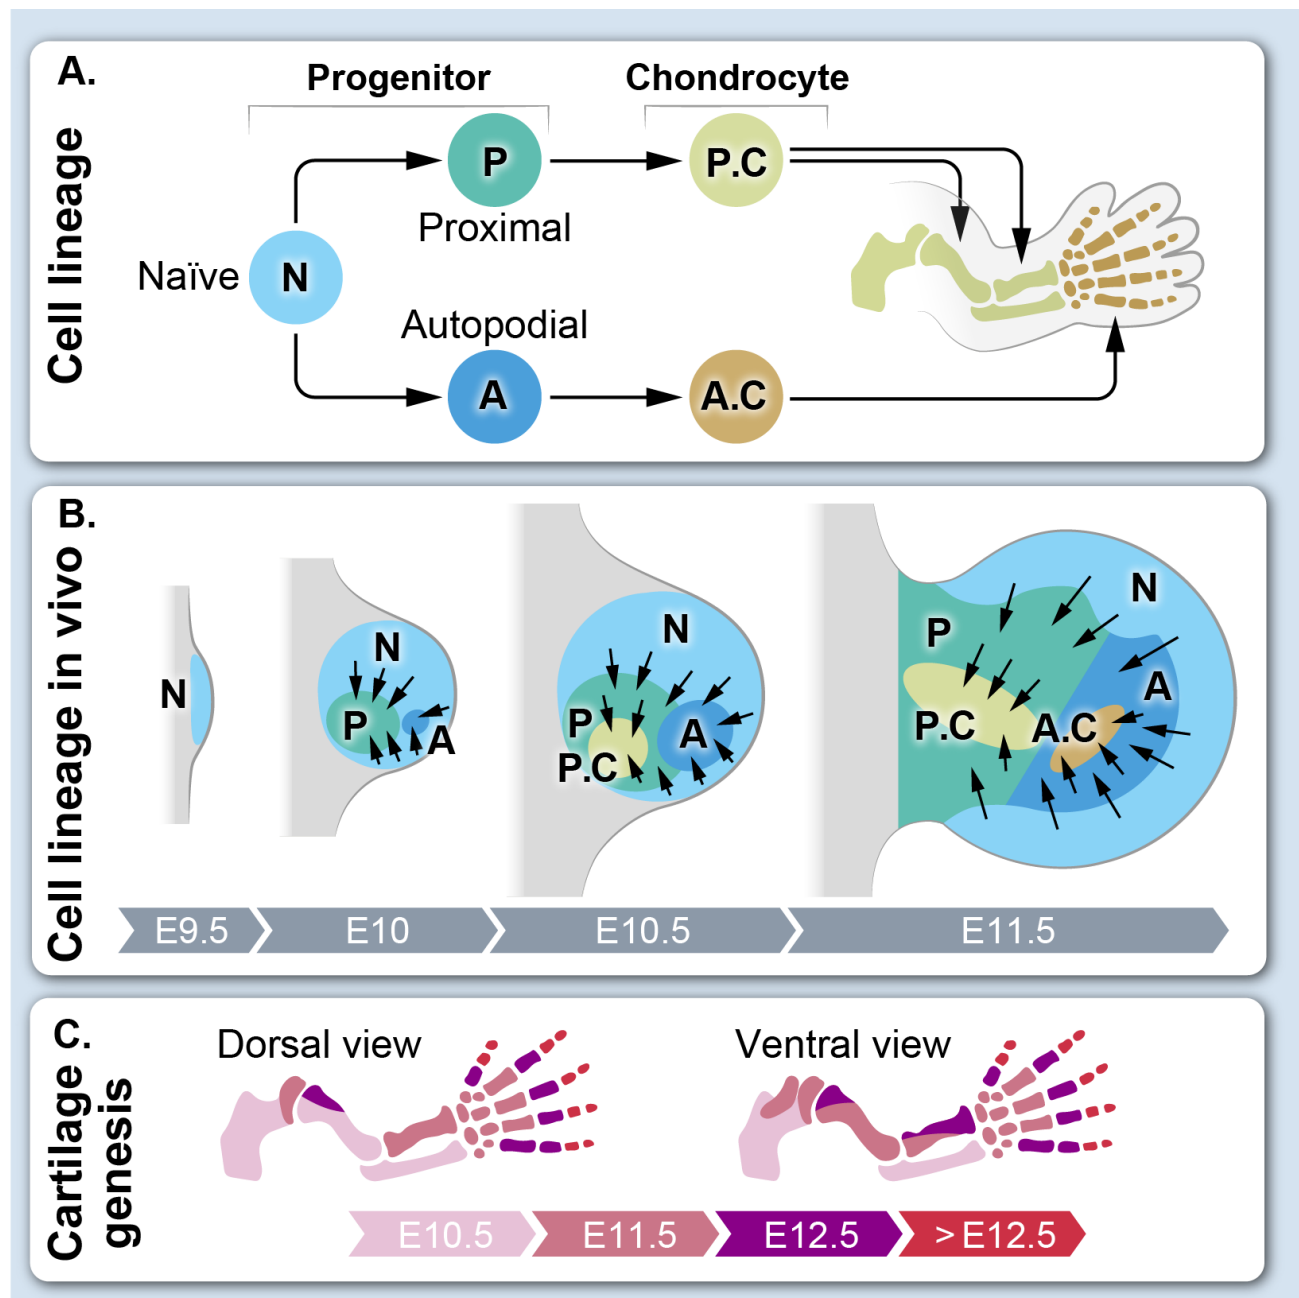

747 **Figure 8. Model for the patterning and development of the limb skeleton**

748 **A.** *Msx1*<sup>+</sup> cells are naïve, multipotent limb mesenchymal progenitors that give rise to  
 749 proximal and autopodial progenitors that, in turn, differentiate into proximal and autopodial  
 750 chondrocytes, respectively.

751 **B.** In the developing limb, *Msx1*<sup>+</sup> naïve progenitors undergo specification first into  
 752 proximal and, soon after, into autopodial progenitors. This progressive process continues  
 753 for several days. Concurrently, already specified proximal and autopodial progenitors start

754 to differentiate into chondroprogenitors by upregulating *Sox9* expression. This process  
755 occurs simultaneously at different locations along the forming limb.

756 **C. A new model for skeleton development.** The skeleton forms progressively and  
757 simultaneously from multiple foci, in a nonconsecutive fashion along the proximal-distal,  
758 dorsal-ventral and anterior-posterior axes. For example, proximal scapula, dorsal humerus  
759 and ulna form together, followed by more distal scapula, ventral humerus, proximal radius  
760 and middle metacarpals.

## 761 **METHODS**

### 762 **Animals**

763 All experiments involving mice were approved by the Institutional Animal Care and Use  
764 Committee (IACUC) of the Weizmann Institute. The generation of *Sox9-CreER<sup>T2</sup>* (Soeda  
765 et al., 2010), *Scx-GFP* (Pryce et al., 2007), *Msx1-CreER<sup>T2</sup>* (Lallemand et al., 2013), *Sox9-*  
766 *GFP* (Chan et al., 2011) and *Rosa26-tdTomato* (Madisen et al., 2010) mice has been  
767 described previously. For fluorescence-activated cell sorting (FACS) experiments, *Sox9-*  
768 *CreER<sup>T2</sup>-tdTomato;Scx-GFP* or *Sox9-GFP* mice were crossed with *Rosa26-tdTomato;Scx-*  
769 *GFP* or C57BL/6 mice, respectively. For lineage tracing experiments, *Msx1-CreER<sup>T2</sup>* were  
770 crossed with *Rosa26-tdTomato* or with *Rosa26-tdTomato;Scx-GFP* reporter mice. Plug  
771 date was defined as E0.5.

772 Induction of Cre recombinase was performed at indicated pregnancy stages by  
773 administration of 5 mg/ml tamoxifen in corn oil X5 body weight by oral gavage. For  
774 harvesting of embryos, timed-pregnant females were euthanized by cervical dislocation.

### 775 **Cell isolation and flow cytometry**

776 Single-cell experiments were performed on forelimbs from E10.5, E11.5, E12.5, E13.5 and  
777 E14.5 mouse embryos. For collection of E10.5 cells, *Sox9-GFP* and *Sox9-CreER<sup>T2</sup>-*  
778 *tdTomato;ScxGFP* (without tamoxifen induction) mice were used. For collection of E11.5-  
779 E14.5 cells, *Sox9-CreER<sup>T2</sup>-tdTomato;ScxGFP* mice were used 48 h after Cre induction.  
780 Forelimbs were dissected and minced in cold PBS using small scissors. For each biological  
781 replicate, forelimbs of embryos from the same litter were pooled together (six forelimbs at



782 E10.5 and E11.5, four forelimbs at E12.5 and E13.5, and two forelimbs from one E14.5  
783 embryo). Forelimb tissues were disassociated using enzymatic digestion. E10.5-E11.5  
784 forelimbs were digested with pre-heated 0.25% trypsin in DMEM medium (ThermoFisher)  
785 and incubated for 10 min at 37°C, gently pipetting every 3 min. E12.5-E14.5 forelimbs  
786 were digested with 1.5 mg/ml collagenase type V (Sigma-Aldrich) in DMEM at 37°C for  
787 10-15 min, gently pipetting every 5 min until the tissue completely dissolved. The digestion  
788 reaction was stopped by addition of DMEM supplemented with 10% FBS and 1% Pen-  
789 Strep. Cell suspensions were filtered through a 40- $\mu$ m nylon mesh and collected by  
790 centrifugation at 1000 rpm for 7 min at 4°C. Supernatant was removed and cells were  
791 resuspended in 500  $\mu$ l ice-cold MACS buffer (with 0.5% BSA and 2 mM EDTA in PBS)  
792 and used immediately for FACS.

793 Flow cytometry analysis and sorting were performed using an AriaFusion instrument (BD  
794 Biosciences, San Jose, CA) equipped with 488, 407, 561 and 633 nm lasers, using a 100-  
795  $\mu$ m nozzle. Sorting gates and fluorescence compensation were defined based on GFP,  
796 tdTomato single-stained and unstained control cells. Live cells were gated using DAPI  
797 staining (1  $\mu$ g/ml) and by size and granularity using FSC-A versus SSC-A. FSC-W versus  
798 FSC-A was used to further distinguish single cells. Unstained, GFP-stained only and  
799 tdTomato-stained only cells were mixed in various combinations to verify that the analysis  
800 excluded false-positive doublets. GFP was detected by excitation at 488 nm and collection  
801 of emission using 502 longpass (LP) and 530/30 bandpass (BP) filters. tdTomato was  
802 detected by excitation at 561 nm and collection of emission using a 582/15 BP filter. DAPI  
803 was detected by excitation at 407 nm and collection of emission using a 450/40 BP filter.  
804 Data were collected and analyzed using BD FACSDiva software v8.0.1 (BD Biosciences).  
805 For single-cell RNA-seq (Jaitin et al., 2014), live cells were sorted into 384-well cell  
806 capture plates containing 2  $\mu$ L of lysis solution and barcoded poly(T) reverse-  
807 transcription primers. In each plate, four empty wells were used as a control. Immediately  
808 after sorting, each plate was spun down to ensure cell immersion into the lysis solution,  
809 snap frozen on dry ice and stored at -80°C until processed.

### 810 **Massively parallel single-cell RNA sequencing (MARS-Seq)**

811 FACS-sorted cells were used for single-cell library preparation according to MARS-seq  
812 protocol, as described in (Jaitin et al., 2014). Briefly, mRNA from cells sorted into capture  
813 plates was barcoded, converted into cDNA and pooled using an automated pipeline. The  
814 pooled sample was then linearly amplified by T7 *in vitro* transcription and the resulting  
815 RNA was fragmented and converted into sequencing-ready library by tagging the samples  
816 with pool barcodes and Illumina sequences during ligation, reverse transcription and PCR.  
817 Each pool of cells was tested for library quality and concentration was assessed as  
818 described in (Jaitin et al., 2014).

### 819 **Low-level processing and filtering**

820 RNA-seq libraries were sequenced by Illumina NextSeq500 at a median sequencing depth  
821 of 58,585 reads per single cell. Sequences were mapped to mouse reference genome  
822 (mm10), demultiplexed, and filtered as previously described (Jaitin et al., 2014), with the  
823 following adaptations. Mapping of reads was done using HISAT version 0.1.6 (Kim et al.,  
824 2015) and reads with multiple mapping positions were excluded. Reads were associated  
825 with genes if they were mapped to an exon defined by a reference set obtained from the  
826 UCSC genome browser extended by up to 2 kb for complete 3' peak acquire. Noise level  
827 was estimated statistically on empty MARS-seq wells; median estimated noise over all  
828 experiments was 2%. Cells with less than 600 UMIs were discarded from the analysis.  
829 After filtering, cells contained a median of 2,800 unique molecules per cell. All  
830 downstream analysis was performed in R.

### 831 **Metacells modeling**

832 We used the metacells pipeline (Baran et al., 2019) with the following specific  
833 parameters (complete script reproducing all analyses from raw data is available in GEO:  
834 GSE185940). We removed mitochondrial genes, genes linked with poorly supported  
835 transcriptional models (annotated with the prefix “RP-“) and cell cycle genes, which were  
836 identified by correlation coefficient of at least 0.1 for one of the anchor genes *Mki67*,  
837 *Hist1h1d*, *Pcna*, *Smc4*, or *Mcm3*. We then filtered cells with total fraction of  
838 mitochondrial gene expression exceeding 30% and cells with high (> 64) expression

839 of hemoglobin genes (*Hba-a2*, *Hba-a1*, *Hbb-b2*, *Hba-x*, *Hbb-b1*). Gene features were  
840 selected for analysis using the parameter  $Tvm=0.2$ .  
841 The gene selection strategy produced 425 marker gene features for the computation of the  
842 metacells balanced similarity graph. We used  $K = 150$ , 500 bootstrap iterations and  
843 otherwise standard parameters (500 iterations; resampling 70% of the cells in each  
844 iteration, and clustering the co-cluster matrix with minimal cluster size set to 20). We  
845 applied outlier filtering.  
846 The resulting metacells model was annotated using the metacells confusion matrix and  
847 analysis of known marker genes. Muscle, epidermal, Schwann and immune metacells  
848 were excluded from further analysis. Next, we applied again the metacells pipeline on the  
849 remaining cells with the above-mentioned parameters.  
850 To annotate the resulting metacells into cell types, we used the metric  $FP_{gene,mc}$ , which  
851 signifies for each gene and metacells the fold change between the geometric mean of this  
852 gene within the metacells and the median geometric mean across all metacells, thus  
853 highlighting for each metacells genes that are highly overexpressed as compared to the  
854 background. Finally, we hierarchically clustered the FP most significantly changing gene  
855 table along with a set of known marker genes to identify the major cell populations.

### 856 **Defining progenitor gene module signatures and scores**

857 To define the gene signatures of progenitor cells, we first identified modules of co-  
858 expressed genes by Pearson's correlation across the metacells  $\log_2 FP_{gene,mc}$  expression of  
859 the 175 most variable genes. The signature genes for each progenitor state were defined  
860 by module scores. Scores were calculated for each metacell by averaging the log  
861 enrichment scores (lfp values) of the genes in the module. This approach limited the  
862 contribution of highly expressed genes to the score.

### 863 **Calculation of a chondrogenic score**

864 To define a chondrogenic gene signature, we identified a list of genes correlated with  
865 *Col2a1* using linear correlation over metacells log enrichment scores. To avoid over-fitting  
866 of the modeling, TFs were excluded from the list. We used this chondrogenic signature for  
867 calculation of chondrogenic score across all cells. Chondrogenic scores were calculated for

868 each cell by averaging the metacells log enrichment scores (lfp values) of the genes in the  
869 signature. Finally, to study gene expression during chondrogenic differentiation, cells were  
870 arranged by increasing ranges of signature scores and binned into 65 bins. To validate our  
871 approach, we tested differential expression of TFs that were not part of the signature gene  
872 set and are upregulated during chondrogenesis.

### 873 **Statistical Analyses**

874 Differential gene expression analysis was performed on log<sub>2</sub> sum of UMIs normalized by  
875 reads per cell, divided by cell number. P-values were calculated using Wilcoxon test to  
876 compare between mean expressions of metacells (for Fig. 2) or cells (for Figs. 3,4).

### 877 **PACT clearing**

878 For sample preparation, E9.5-E14.5 embryos were harvested from B16, *Msx1-*  
879 *CreER*; *Rosa26-tdTomato*, *Scx-GFP* and *Msx1-CreER<sup>T2</sup>*; *Rosa26-tdTomato* timed-  
880 pregnant females and fixed in ice-cold 4% PFA in 1x PBS overnight. PFA-fixed embryos  
881 were dissected and forelimbs were cleared using PACT method (Trewick et al., 2015;  
882 Yang et al., 2014). Briefly, samples were washed in PBS, then incubated in hydrogel  
883 solution containing 4% (wt/vol) acrylamide in 1x PBS with 0.25% thermal initiator 2,2'-  
884 azobis[2-(2-imidazolin-2-yl)propane]dihydrochloride (Wako, cat. no. VA-044) at 4°C  
885 overnight. The next day, hydrogel was polymerized at 37°C for 3 hours. The samples  
886 were removed from the hydrogel, washed in PBS, and moved to 10% SDS with 0.01%  
887 sodium azide, shaking (60 rpm) at 37°C for 1- 5 days, changing the SDS solution each  
888 day. Cleared samples were washed three times for 5 min with 1× PBST (PBS + 0.1%  
889 Triton X-100 + 0.01% sodium azide) at room temperature and then subjected to whole-  
890 mount *in situ* HCR or whole-mount SOX9 immunostaining.

### 891 **Whole-mount immunostaining**

892 To detect SOX9, samples were first incubated with proteinase K (Millipore Sigma,  
893 P9290) for 10 min at room temperature, washed and post-fixed again in 4% PFA. Then,  
894 samples were incubated with 5% goat serum, 1% BSA dissolved in PBST at 4°C

895 overnight in order to block non-specific binding of immunoglobulin. Next, samples were  
896 incubated with primary anti-SOX9 antibodies (1:100, AB5535 Millipore Sigma) in 5%  
897 goat serum, 1% BSA dissolved in PBST shaking at 37°C for 5 days. Samples were  
898 washed four times for 2 h with 1× PBST at room temperature. Next, samples were  
899 incubated with secondary Cy5 antibodies (1:100, 715-165-150, Jackson  
900 ImmunoResearch) and 1:100 DAPI (1 mg/ml) in 5% goat serum, 1% BSA dissolved in  
901 PBST shaking at 37°C for 2 days. Samples were washed four times for 2 h with 1× PBST  
902 at room temperature and then prepared for light sheet imaging. To bring the refractive  
903 index (RI) of the sample to 1.45, it was submersed in a refractive index matching solution  
904 (RIMS) prepared by dissolving 35 g of Histodenz (Millipore Sigma, D2158) in 30 ml  
905 0.02 M phosphate buffer, shaking gently at room temperature for 1-2 days. Finally,  
906 samples were embedded in 1% low gelling Agarose (Millipore Sigma, A9414) in PBS in  
907 a glass capillary, submerged in RIMS and stored protected from light at room  
908 temperature until imaging.

### 909 **Whole-mount *in situ* hybridization chain reaction (HCR)**

910 The *Msx1* (NM\_010835.2), *Shox2* (NM\_001302358.1), *Hoxd13* (NM\_008275.4) and  
911 *Sox9* (NM\_011448.4) probes and DNA HCR amplifiers, hybridization, wash and  
912 amplification buffers were purchased from Molecular Instruments. *In situ* HCR v3.0 was  
913 performed using the protocols detailed in [www.molecularinstruments.com](http://www.molecularinstruments.com). Briefly,  
914 PACT-cleared samples were pre-incubated with hybridization buffer and incubated  
915 overnight at 37°C, 60 rpm with probe solution containing 1 µL of each probe in 250 µL  
916 of pre-heated probe hybridization buffer. The next day, probes were washed four times  
917 for 15 min at 60 rpm with pre-heated wash buffer, followed by two 5-min washes at room  
918 temperature with 5xSSCT. Next, samples were pre-amplified with 250 µL of  
919 amplification buffer for 5 min at room temperature and incubated with 250 µL of hairpin  
920 mixture (5 µL of hairpin h1 and hairpin h2 from 3 µM stock for each probe) overnight in  
921 the dark at room temperature. The following day, samples were washed with 5xSSCT  
922 two times for 5 min, two times for 30 min and once for 5 min at room temperature, gently  
923 shaking. For nuclear staining, samples were incubated with 1:100 DAPI/PBS solution  
924 (DAPI stock, 1mg/ml) overnight at 4°C, gently shaking. Finally, samples were washed

925 twice with 2XSSC for 5 min at room temperature gently shaking and prepared for light  
926 sheet imaging as described above for SOX9-immunostained samples.

927 **Light-sheet fluorescence microscopy**

928 Samples were imaged with a Zeiss Lightsheet Z.1 microscope. For each limb, a low-  
929 resolution image of the entire limb was taken with the 20× Clarity lens at a zoom of 0.36.  
930 Light-sheet fusion of images was done if necessary in Zen software (Zeiss). Tile stitching  
931 and 3D image reconstruction were performed using Imaris software (Bitplane).

932 **References**

- 933 Akiyama<sup>‡</sup>, H., Kim<sup>‡</sup>, J.-E., Nakashima, K., Balmes, G., Iwai, N., Deng, J.M., Zhang, Z.,  
934 Martin, J.F., Behringer, R.R., Nakamura, T., et al. (2005). Osteo-chondroprogenitor cells  
935 are derived from Sox9 expressing precursors. *Proc. Natl. Acad. Sci. 102*, 14665–14670.
- 936 Akiyama, H., Chaboissier, M.-C., Martin, J.F., Schedl, A., and Crombrughe, B. de  
937 (2002a). The transcription factor Sox9 has essential roles in successive steps of the  
938 chondrocyte differentiation pathway and is required for expression of Sox5 and Sox6.  
939 *Genes Dev. 16*, 2813–2828.
- 940 Akiyama, H., Chaboissier, M.-C., Martin, J.F., Schedl, A., and de Crombrughe, B.  
941 (2002b). The transcription factor Sox9 has essential roles in successive steps of the  
942 chondrocyte differentiation pathway and is required for expression of Sox5 and Sox6.  
943 *Genes Dev. 16*, 2813–2828.
- 944 ALAPPAT, S., ZHANG, Z.Y., and CHEN, Y.P. (2003). Msx homeobox gene family and  
945 craniofacial development. *Cell Res. 2003 136 13*, 429–442.
- 946 Baran, Y., Bercovich, A., Sebe-Pedros, A., Lubling, Y., Giladi, A., Chomsky, E., Meir,  
947 Z., Hoichman, M., Lifshitz, A., and Tanay, A. (2019). MetaCell: analysis of single-cell  
948 RNA-seq data using K-nn graph partitions. *Genome Biol. 20*, 206.
- 949 Bell, D.M., Leung, K.K.H., Wheatley, S.C., Ng, L.J., Zhou, S., Ling, K.W., Sham, M.H.,  
950 Koopman, P., Tam, P.P.L., and Cheah, K.S.E. (1997). SOX9 directly regulates the type-II  
951 collagen gene. *Nat. Genet. 1997 162 16*, 174–178.
- 952 Benoit de CrombrugheU, Veronique Lefebvre, R.R.B., and Weimin Bi, Shunichi  
953 Murakami, W.H. (2000). Transcriptional mechanisms of chondrocyte differentiation.  
954 *Matrix Biol.*
- 955 Bensoussan-Trigano, V., Lallemand, Y., Cloment, C. Saint, and Robert, B. (2011). Msx1  
956 and Msx2 in limb mesenchyme modulate digit number and identity. *Dev. Dyn. 240*,  
957 1190–1202.
- 958 Bi, W., Deng, J.M., Zhang, Z., Behringer, R.R., and de Crombrughe, B. (1999). Sox9 is  
959 required for cartilage formation. *Nat. Genet. 22*, 85–89.

- 960 Blitz, E., Sharir, A., Akiyama, H., and Zelzer, E. (2013). Tendon-bone attachment unit is  
961 formed modularly by a distinct pool of *Scx* - and *Sox9* -positive progenitors.  
962 *Development* *140*, 2680–2690.
- 963 Campbell, A.L., Shih, H.-P., Xu, J., Gross, M.K., and Kioussi, C. (2012). Regulation of  
964 Motility of Myogenic Cells in Filling Limb Muscle Anlagen by *Pitx2*. *PLoS One* *7*,  
965 e35822.
- 966 Capdevila, J., Tsukui, T., Esteban, C.R., Zappavigna, V., and Belmonte, J.C.I. (1999).  
967 Control of Vertebrate Limb Outgrowth by the Proximal Factor *Meis2* and Distal  
968 Antagonism of BMPs by *Gremlin*. *Mol. Cell* *4*, 839–849.
- 969 Chan, H.Y., V., S., Xing, X., Kraus, P., Yap, S.P., Ng, P., Lim, S.L., and Lufkin, T.  
970 (2011). Comparison of IRES and F2A-Based Locus-Specific Multicistronic Expression in  
971 Stable Mouse Lines. *PLoS One* *6*, e28885.
- 972 Chang, H.-M., Martinez, N.J., Thornton, J.E., Hagan, J.P., Nguyen, K.D., and Gregory,  
973 R.I. (2012). *Trim71* cooperates with microRNAs to repress *Cdkn1a* expression and  
974 promote embryonic stem cell proliferation. *Nat. Commun.* *2012* *3*, 1–10.
- 975 Coudert, A.E., Pibouin, L., Vi-Fane, B., Thomas, B.L., Macdougall, M., Choudhury, A.,  
976 Robert, B., Sharpe, P.T., Berdal, A., and Lezot, F. (2005). Expression and regulation of  
977 the *Msx1* natural antisense transcript during development. *Nucleic Acids Res.* *33*, 5208.
- 978 Delgado, I., and Torres, M. (2017). Coordination of limb development by crosstalk  
979 among axial patterning pathways. *Dev. Biol.* *429*, 382–386.
- 980 Delgado, I., López-Delgado, A.C., Roselló-Díez, A., Giovinazzo, G., Cadenas, V.,  
981 Fernández-de-Manuel, L., Sánchez-Cabo, F., Anderson, M.J., Lewandoski, M., and  
982 Torres, M. (2020). Proximo-distal positional information encoded by an *Fgf*-regulated  
983 gradient of homeodomain transcription factors in the vertebrate limb. *Sci. Adv.* *6*,  
984 eaaz0742.
- 985 Desanlis, I., Paul, R., and Kmita, M. (2020a). Transcriptional Trajectories in Mouse Limb  
986 Buds Reveal the Transition from Anterior-Posterior to Proximal-Distal Patterning at  
987 Early Limb Bud Stage. *J. Dev. Biol.* *8*, 1–16.



988 Desanlis, I., Kherdjemil, Y., Mayran, A., Bouklouch, Y., Gentile, C., Sheth, R., Zeller,  
989 R., Drouin, J., and Kmita, M. (2020b). HOX13-dependent chromatin accessibility  
990 underlies the transition towards the digit development program. *Nat. Commun.* 2020 111  
991 *11*, 1–10.

992 Dudley, A.T., Ros, M.A., and Tabin, C.J. (2002). A re-examination of proximodistal  
993 patterning during vertebrate limb development. *Nat.* 2002 4186897 *418*, 539–544.

994 Eyal, S., Kult, S., Rubin, S., Krief, S., Felsenthal, N., Pineault, K.M., Leshkowitz, D.,  
995 Salame, T.M., Addadi, Y., Wellik, D.M., et al. (2019). Bone morphology is regulated  
996 modularly by global and regional genetic programs. *Dev.* *146*.

997 Fabre, P.J., Leleu, M., Mascrez, B., Lo Giudice, Q., Cobb, J., and Duboule, D. (2018).  
998 Heterogeneous combinatorial expression of Hoxd genes in single cells during limb  
999 development. *BMC Biol.* 2018 161 *16*, 1–15.

1000 Feregrino, C., Sacher, F., Parnas, O., and Tschopp, P. (2019). A single-cell transcriptomic  
1001 atlas of the developing chicken limb. *BMC Genomics* 2019 201 *20*, 1–15.

1002 Fromental-Ramain, C., Warot, X., Messadecq, N., LeMeur, M., Dolle, P., and Chambon,  
1003 P. (1996). Hoxa-13 and Hoxd-13 play a crucial role in the patterning of the limb autopod.  
1004 *Development* *122*, 2997–3011.

1005 Huang, A.H. (2017). Coordinated development of the limb musculoskeletal system:  
1006 Tendon and muscle patterning and integration with the skeleton. *Dev. Biol.* *429*, 420.

1007 Jaitin, D.A., Kenigsberg, E., Keren-Shaul, H., Elefant, N., Paul, F., Zaretsky, I., Mildner,  
1008 A., Cohen, N., Jung, S., Tanay, A., et al. (2014). Massively parallel single-cell RNA-seq  
1009 for marker-free decomposition of tissues into cell types. *Science* (80-. ). *343*, 776–779.

1010 Johnson, R.L., and Tabin, C.J. (1997). Molecular Models for Vertebrate Limb  
1011 Development. *Cell* *90*, 979–990.

1012 Kelly, N.H., Huynh, N.P.T., and Guilak, F. (2020). Single cell RNA-sequencing reveals  
1013 cellular heterogeneity and trajectories of lineage specification during murine embryonic  
1014 limb development. *Matrix Biol.* *89*, 1.

- 1015 Kim, D., Langmead, B., and Salzberg, S.L. (2015). HISAT: a fast spliced aligner with  
1016 low memory requirements. *Nat. Methods* *12*, 357–360.
- 1017 Knezevic, V., De Santo, R., Schughart, K., Huffstadt, U., Chiang, C., Mahon, K.A., and  
1018 Mackem, S. (1997). Hoxd-12 differentially affects preaxial and postaxial chondrogenic  
1019 branches in the limb and regulates Sonic hedgehog in a positive feedback loop.  
1020 *Development* *124*, 4523–4536.
- 1021 Lallemand, Y., Nicola, M.-A., Ramos, C., Bach, A., Cloment, C. Saint, and Robert, B.  
1022 (2005). Analysis of Msx1; Msx2 double mutants reveals multiple roles for Msx genes in  
1023 limb development. *Development* *132*, 3003–3014.
- 1024 Lallemand, Y., Bensoussan, V., Cloment, C. Saint, and Robert, B. (2009). Msx genes are  
1025 important apoptosis effectors downstream of the Shh/Gli3 pathway in the limb. *Dev.*  
1026 *Biol.* *331*, 189–198.
- 1027 Lallemand, Y., Moreau, J., Cloment, C. Saint, Vives, F.L., and Robert, B. (2013).  
1028 Generation and characterization of a tamoxifen inducible Msx1CreERT2 knock-in allele.  
1029 *Genesis* *51*, 110–119.
- 1030 Lefebvre, V.R., Huang, W., Harley, V.R., Goodfellow, P.N., and De Crombrughe, B.  
1031 (1997). SOX9 Is a Potent Activator of the Chondrocyte-Specific Enhancer of the Pro $\alpha$   
1032 1(II) Collagen Gene. *J. Biol. Chem.* *272*, 2336–2346.
- 1033 Li, D., Sakuma, R., Vakili, N.A., Mo, R., Puvindran, V., Deimling, S., Zhang, X.,  
1034 Hopyan, S., and Hui, C. chung (2014). Formation of Proximal and Anterior Limb  
1035 Skeleton Requires Early Function of Irx3 and Irx5 and Is Negatively Regulated by Shh  
1036 Signaling. *Dev. Cell* *29*, 233–240.
- 1037 Liu, H., Xu, J., Liu, C.-F., Lan, Y., Wylie, C., and Jiang, R. (2015). Whole transcriptome  
1038 expression profiling of mouse limb tendon development by using RNA-seq. *J. Orthop.*  
1039 *Res.* *33*, 840.
- 1040 Madisen, L., Zwingman, T.A., Sunkin, S.M., Oh, S.W., Zariwala, H.A., Gu, H., Ng, L.L.,  
1041 Palmiter, R.D., Hawrylycz, M.J., Jones, A.R., et al. (2010). A robust and high-throughput  
1042 Cre reporting and characterization system for the whole mouse brain. *Nat. Neurosci.* *13*,

- 1043 133–140.
- 1044 Mariani, F. V., Ahn, C.P., and Martin, G.R. (2008). Genetic evidence that FGFs play an  
1045 instructive role in limb proximal-distal patterning. *Nature* 453, 401.
- 1046 Melton, C., Judson, R.L., and Belloch, R. (2010). Opposing microRNA families regulate  
1047 self-renewal in mouse embryonic stem cells. *Nat.* 2010 4637281 463, 621–626.
- 1048 Mercader, N., Leonardo, E., Azplazu, N., Serrano, A., Morata, G., Martínez-A, C., and  
1049 Torres, M. (1999a). Conserved regulation of proximodistal limb axis development by  
1050 Meis1/Hth. *Nat.* 1999 4026760 402, 425–429.
- 1051 Mercader, N., Leonardo, E., Azplazu, N., Serrano, A., Morata, G., Martínez-A, C., and  
1052 Torres, M. (1999b). Conserved regulation of proximodistal limb axis development by  
1053 Meis1/Hth. *Nat.* 1999 4026760 402, 425–429.
- 1054 Mercader, N., Leonardo, E., Piedra, M.E., Martinez-A, C., Ros, M.A., and Torres, M.  
1055 (2000). Opposing RA and FGF signals control proximodistal vertebrate limb  
1056 development through regulation of Meis genes. *Development* 127.
- 1057 Mercader, N., Selleri, L., Criado, L.M., Pallares, P., Parras, C., Cleary, M.L., and Torres,  
1058 M. (2009). Ectopic Meis1 expression in the mouse limb bud alters P-D patterning in a  
1059 Pbx1-independent manner. *Int. J. Dev. Biol.* 53, 1483–1494.
- 1060 Nagakura, R., Yamamoto, M., Jeong, J., Hinata, N., Katori, Y., Chang, W.-J., and Abe, S.  
1061 Switching of Sox9 expression during musculoskeletal system development.
- 1062 Nakamura, Y., Yamamoto, K., He, X., Otsuki, B., Kim, Y., Murao, H., Soeda, T.,  
1063 Tsumaki, N., Deng, J.M., Zhang, Z., et al. (2011). Wwp2 is essential for palatogenesis  
1064 mediated by the interaction between Sox9 and mediator subunit 25. *Nat. Commun.* 2,  
1065 251.
- 1066 Nassari, S., Duprez, D., and Fournier-Thibault, C. (2017a). Non-myogenic Contribution  
1067 to Muscle Development and Homeostasis: The Role of Connective Tissues. *Front. Cell*  
1068 *Dev. Biol.* 0, 22.
- 1069 Nassari, S., Blavet, C., Bonnin, M.-A., Stricker, S., Duprez, D., and Fournier-Thibault, C.

1070 (2017b). The chemokines CXCL12 and CXCL14 differentially regulate connective tissue  
1071 markers during limb development. *Sci. Rep.* 7, 17279.

1072 Niswander, L. (2003). Pattern formation: old models out on a limb. *Nat. Rev. Genet.*  
1073 2003 42 4, 133–143.

1074 Pastor, W.A., Liu, W., Chen, D., Ho, J., Kim, R., Hunt, T.J., Lukianchikov, A., Liu, X.,  
1075 Polo, J.M., Jacobsen, S.E., et al. (2018). TFAP2C regulates transcription in human naive  
1076 pluripotency by opening enhancers. *Nat. Cell Biol.* 2018 205 20, 553–564.

1077 Patterson, M., Chan, D.N., Ha, I., Case, D., Cui, Y., Handel, B. Van, Mikkola, H.K., and  
1078 Lowry, W.E. (2011). Defining the nature of human pluripotent stem cell progeny. *Cell*  
1079 *Res.* 2011 221 22, 178–193.

1080 Pellegrini, M., Pantano, S., Fumi, M.P., Lucchini, F., and Forabosco, A. (2001). Agenesis  
1081 of the Scapula in *Emx2* Homozygous Mutants. *Dev. Biol.* 232, 149–156.

1082 Petit, F., Sears, K.E., and Ahituv, N. (2017). Limb development: a paradigm of gene  
1083 regulation. *Nat. Rev. Genet.* 2017 184 18, 245–258.

1084 Probst, S., Kraemer, C., Demougin, P., Sheth, R., Martin, G.R., Shiratori, H., Hamada,  
1085 H., Iber, D., Zeller, R., and Zuniga, A. (2011). SHH propagates distal limb bud  
1086 development by enhancing CYP26B1-mediated retinoic acid clearance via AER-FGF  
1087 signalling. *Development* 138, 1913–1923.

1088 Pryce, B.A., Brent, A.E., Murchison, N.D., Tabin, C.J., and Schweitzer, R. (2007).  
1089 Generation of transgenic tendon reporters, *ScxGFP* and *ScxAP*, using regulatory  
1090 elements of the scleraxis gene. *Dev. Dyn.* 236, 1677–1682.

1091 Reijntjes, S., Stricker, S., and Mankoo, B.S. (2007). A comparative analysis of *Meox1*  
1092 and *Meox2* in the developing somites and limbs of the chick embryo. *Int. J. Dev. Biol.*

1093 Rybak, A., Fuchs, H., Hadian, K., Smirnova, L., Wulczyn, E.A., Michel, G., Nitsch, R.,  
1094 Krappmann, D., and Wulczyn, F.G. (2009). The *let-7* target gene mouse *lin-41* is a stem  
1095 cell specific E3 ubiquitin ligase for the miRNA pathway protein Ago2. *Nat. Cell Biol.*  
1096 2009 1112 11, 1411–1420.

- 1097 Salbaum, J.M. (1998). Punc, a novel mouse gene of the immunoglobulin superfamily, is  
1098 expressed predominantly in the developing nervous system. *Mech. Dev.* *71*, 201–204.
- 1099 Saunders, J.W. (1948). The proximo-distal sequence of origin of the parts of the chick  
1100 wing and the role of the ectoderm. *J. Exp. Zool.* *108*, 363–403.
- 1101 Schweitzer, R., Chyung, J.H., Murtaugh, L.C., Brent, A.E., Rosen, V., Olson, E.N.,  
1102 Lassar, A., and Tabin, C.J. (2001). Analysis of the tendon cell fate using Scleraxis, a  
1103 specific marker for tendons and ligaments. *Development* *128*.
- 1104 Scotti, M., Kherdjemil, Y., Roux, M., and Kmita, M. (2015a). A Hoxa13: Cre Mouse  
1105 Strain for Conditional Gene Manipulation in Developing Limb, Hindgut, and Urogenital  
1106 System. *Genesis* *53*, 366.
- 1107 Scotti, M., Kherdjemil, Y., Roux, M., and Kmita, M. (2015b). A Hoxa13: Cre Mouse  
1108 Strain for Conditional Gene Manipulation in Developing Limb, Hindgut, and Urogenital  
1109 System. *Genesis* *53*, 366.
- 1110 Shen, H., Wilke, T., Ashique, A.M., Narvey, M., Zerucha, T., Savino, E., Williams, T.,  
1111 and Richman, J.M. (1997). Chicken Transcription Factor AP-2: Cloning, Expression and  
1112 Its Role in Outgrowth of Facial Prominences and Limb Buds. *Dev. Biol.* *188*, 248–266.
- 1113 Sheth, R., Bastida, M.F., and Ros, M. (2007). Hoxd and Gli3 interactions modulate digit  
1114 number in the amniote limb. *Dev. Biol.* *310*, 430–441.
- 1115 Soeda, T., Deng, J.M., de Crombrughe, B., Behringer, R.R., Nakamura, T., and  
1116 Akiyama, H. (2010). Sox9-expressing precursors are the cellular origin of the cruciate  
1117 ligament of the knee joint and the limb tendons. *Genesis* *48*, 635–644.
- 1118 Stricker, S., Mathia, S., Haupt, J., Seemann, P., Meier, J., and Mundlos, S. (2012). Odd-  
1119 Skipped Related Genes Regulate Differentiation of Embryonic Limb Mesenchyme and  
1120 Bone Marrow Mesenchymal Stromal Cells. *Stem Cells Dev.* *21*, 623–633.
- 1121 Sugimoto, Y., Takimoto, A., Akiyama, H., Kist, R., Scherer, G., Nakamura, T., Hiraki,  
1122 Y., and Shukunami, C. (2013). Scx<sup>+</sup>/Sox9<sup>+</sup> progenitors contribute to the establishment of  
1123 the junction between cartilage and tendon/ligament. *Development* *140*, 2280–2288.

- 1124 Summerbell, D., LEWIS, J.H., and WOLPERT, L. (1973). Positional Information in  
1125 Chick Limb Morphogenesis. *Nature* 244, 492–496.
- 1126 Sun, C., Zhang, T., Liu, C., Gu, S., and Chen, Y. (2013). Generation of Shox2-Cre allele  
1127 for tissue specific manipulation of genes in the developing heart, palate, and limb.  
1128 *Genesis* 51, 515.
- 1129 Sun, X., Mariani, F. V., and Martin, G.R. (2002). Functions of FGF signalling from the  
1130 apical ectodermal ridge in limb development. *Nat.* 2002 4186897 418, 501–508.
- 1131 Tabin, C., and Wolpert, L. (2007a). Rethinking the proximodistal axis of the vertebrate  
1132 limb in the molecular era. *Genes Dev.* 21, 1433–1442.
- 1133 Tabin, C., and Wolpert, L. (2007b). Rethinking the proximodistal axis of the vertebrate  
1134 limb in the molecular era. *Genes Dev.* 21, 1433–1442.
- 1135 Tickle, C. (2005). Making digit patterns in the vertebrate limb. *Nat. Rev. Mol. Cell Biol.*  
1136 2006 71 7, 45–53.
- 1137 Treweek, J.B., Chan, K.Y., Flytzanis, N.C., Yang, B., Deverman, B.E., Greenbaum, A.,  
1138 Lignell, A., Xiao, C., Cai, L., Ladinsky, M.S., et al. (2015). Whole-body tissue  
1139 stabilization and selective extractions via tissue-hydrogel hybrids for high-resolution  
1140 intact circuit mapping and phenotyping. *Nat. Protoc.* 2015 1011 10, 1860–1896.
- 1141 Tzchori, I., Day, T.F., Carolan, P.J., Zhao, Y., Wassif, C.A., Li, L., Lewandoski, M.,  
1142 Gorivodsky, M., Love, P.E., Porter, F.D., et al. (2009). LIM homeobox transcription  
1143 factors integrate signaling events that control three-dimensional limb patterning and  
1144 growth. *Development* 136, 1375–1385.
- 1145 Ulrike Hirning-Folz, Monika Wilda, Volkhart Rippe, Jorn Bullerdiek, and H.H. (1998).  
1146 The expression pattern of the Hmgic gene during development. *Genes Chromosom.*  
1147 *Cancer* 23, 350–357.
- 1148 Vallecillo-García, P., Orgeur, M., Vom Hofe-Schneider, S., Stumm, J., Kappert, V.,  
1149 Ibrahim, D.M., Börno, S.T., Hayashi, S., Relaix, F., Hildebrandt, K., et al. (2017). Odd  
1150 skipped-related 1 identifies a population of embryonic fibro-adipogenic progenitors  
1151 regulating myogenesis during limb development. *Nat. Commun.*

- 1152 Vickerman, L., Neufeld, S., and Cobb, J. (2011). *Shox2* function couples neural,  
1153 muscular and skeletal development in the proximal forelimb. *Dev. Biol.* *350*, 323–336.
- 1154 Wang, J., Rao, S., Chu, J., Shen, X., Levasseur, D.N., Theunissen, T.W., and Orkin, S.H.  
1155 (2006). A protein interaction network for pluripotency of embryonic stem cells. *Nat.*  
1156 *2006 4447117 444*, 364–368.
- 1157 Watson, B.A., Feenstra, J.M., Arsdale, J.M. Van, Rai-Bhatti, K.S., Kim, D.J.H., Coggins,  
1158 A.S., Mattison, G.L., Yoo, S., Steinman, E.D., Pira, C.U., et al. (2018). LHX2 Mediates  
1159 the FGF-to-SHH Regulatory Loop during Limb Development. *J. Dev. Biol.* 2018, Vol. 6,  
1160 Page 13 6, 13.
- 1161 Wilson-Rawls, J., Rhee, J.M., and Rawls, A. (2004). Paraxis Is a Basic Helix-Loop-Helix  
1162 Protein That Positively Regulates Transcription through Binding to Specific E-box  
1163 Elements \*. *J. Biol. Chem.* *279*, 37685–37692.
- 1164 Wolpert, L. (2002). The progress zone model for specifying positional information. *Int. J.*  
1165 *Dev. Biol.* *46*, 869–870.
- 1166 Worringer, K.A., Rand, T.A., Hayashi, Y., Sami, S., Takahashi, K., Tanabe, K., Narita,  
1167 M., Srivastava, D., and Yamanaka, S. (2014). The *let-7/LIN-41* Pathway Regulates  
1168 Reprogramming to Human Induced Pluripotent Stem Cells by Controlling Expression of  
1169 Prodifferentiation Genes. *Cell Stem Cell* *14*, 40–52.
- 1170 Xianjin Zhou, Kathleen F. Benson, H.R.A.& K.C. (1995). Mutation responsible for the  
1171 mouse pygmy phenotype in the developmentally regulated factor HMGI-C. *Nature* *376*,  
1172 771–774.
- 1173 Yang, Y., and Wilson, M.J. (2015). *Lhx9* gene expression during early limb development  
1174 in mice requires the FGF signalling pathway. *Gene Expr. Patterns* *19*, 45–51.
- 1175 Yang, B., Treweek, J.B., Kulkarni, R.P., Deverman, B.E., Chen, C.-K., Lubeck, E., Shah,  
1176 S., Cai, L., and Gradinaru, V. (2014). Single-Cell Phenotyping within Transparent Intact  
1177 Tissue through Whole-Body Clearing. *Cell* *158*, 945–958.
- 1178 Yu, J., Vodyanik, M.A., Smuga-Otto, K., Antosiewicz-Bourget, J., Frane, J.L., Tian, S.,  
1179 Nie, J., Jonsdottir, G.A., Ruotti, V., Stewart, R., et al. (2007). Induced Pluripotent Stem

- 1180 Cell Lines Derived from Human Somatic Cells. *Science* (80-. ). *318*, 1917–1920.
- 1181 Zákány, J., Fromental-Ramain, C., Warot, X., and Duboule, D. (1997). Regulation of  
1182 number and size of digits by posterior Hox genes: A dose-dependent mechanism with  
1183 potential evolutionary implications. *Proc. Natl. Acad. Sci.* *94*, 13695–13700.
- 1184 Zeller, R., López-Ríos, J., and Zuniga, A. (2009). Vertebrate limb bud development:  
1185 moving towards integrative analysis of organogenesis. *Nat. Rev. Genet.* *10*, 845–858.
- 1186 Zhang, J., Tam, W.-L., Tong, G.Q., Wu, Q., Chan, H.-Y., Soh, B.-S., Lou, Y., Yang, J.,  
1187 Ma, Y., Chai, L., et al. (2006). Sall4 modulates embryonic stem cell pluripotency and  
1188 early embryonic development by the transcriptional regulation of Pou5f1. *Nat. Cell Biol.*  
1189 2006 810 8, 1114–1123.
- 1190 Zhang, J., Ratanasirintrawoot, S., Chandrasekaran, S., Li, H., Collins, J.J., and Daley  
1191 Correspondence, G.Q. (2016). LIN28 Regulates Stem Cell Metabolism and Conversion  
1192 to Primed Pluripotency Accession Numbers GSE67568. *Cell Stem Cell* *19*, 66–80.
- 1193 Zhao, F., Bosserhoff, A.-K., Buettner, R., and Moser, M. (2011). A Heart-Hand  
1194 Syndrome Gene: Tfap2b Plays a Critical Role in the Development and Remodeling of  
1195 Mouse Ductus Arteriosus and Limb Patterning. *PLoS One* *6*, e22908.
- 1196 Zuniga, A. (2015). Next generation limb development and evolution: old questions, new  
1197 perspectives. *Development* *142*, 3810–3820.

## 1198 **Acknowledgements**

1199 We thank Nitzan Konstantin for expert editorial assistance, Neria Sharabi from the  
1200 Department of Veterinary Resources, Weizmann Institute for his help with mouse  
1201 maintenance, Dr. Yoseph Addadi and Ofra Golani from the MICC Cell Observatory unit  
1202 at Life Sciences Core Facilities, Weizmann Institute, for their guidance and assistance  
1203 with light sheet imaging experiments and analyzes, and Dr. Tomer Meir Salame from the  
1204 flow cytometry unit at Life Sciences Core Facilities, Weizmann Institute, for his  
1205 assistance with FACS. We thank Efrat Davidson from the Weizmann Institute



1206 Department of Design, Photography and Printing for designing the graphic model.  
1207 Special thanks to all members of the Zelzer and Amit laboratories for encouragement and  
1208 advice. I.A. is an Eden and Steven Romick Professorial Chair, supported by the Merck  
1209 KGaA, Darmstadt, Germany, the Chan Zuckerberg Initiative (CZI), the HHMI  
1210 International Scholar award, the European Research Council Consolidator Grant (ERC-  
1211 COG) 724471- HemTree2.0, an SCA award of the Wolfson Foundation and Family  
1212 Charitable Trust, the Thompson Family Foundation, an MRA Established Investigator  
1213 Award (509044), the Helen and Martin Kimmel award for innovative investigation, the  
1214 NeuroMac DFG/Transregional Collaborative Research Center Grant.  
1215 This study was supported by grants from the David and Fela Shapell Family Center for  
1216 Genetic Disorders and by The Estate of Mr. and Mrs. van Adelsbergen (to E.Z).

#### 1217 **Author information**

1218 These authors contributed equally: Svetlana Markman, Mor Zada.

1219 These authors jointly supervised this work: Elazar Zelzer, Ido Amit.

1220 Affiliations

1221 **Department of Molecular Genetics, Weizmann Institute of Science, Rehovot, Israel**

1222 Svetlana Markman & Elazar Zelzer

1223 **Department of Immunology, Weizmann Institute of Science, Rehovot, Israel**

1224 Mor Zada, Eyal David, Amir Giladi & Ido Amit

1225

#### 1226 **Contributions**

1227 S.M. designed, performed, and analyzed experiments; performed flow cytometry sorting  
1228 experiments, annotated and interpreted the single-cell data, performed and analyzed  
1229 imaging experiments. M.Z. performed flow cytometry sorting experiments and library  
1230 preparations. E.D and A.G performed single-cell bioinformatics analyses. S.M, M.Z, E.D,  
1231 A.G, I.A and E.Z generated the figures. S.M, E.Z and I.A wrote the manuscript. E.Z and  
1232 I.A supervised the project. All authors discussed the results and commented on the  
1233 manuscript at all stages.

1234

#### 1235 **Corresponding authors**

1236 Correspondence to Elazar Zelzer or Ido Amit.

1237

1238 **Ethics declarations**

1239 Competing interests

1240 The authors declare no competing interests.

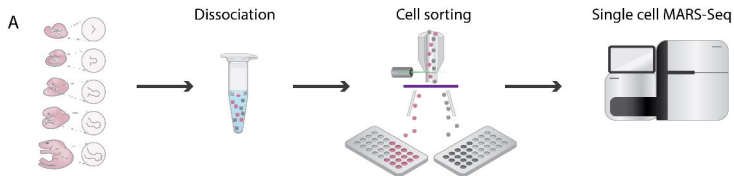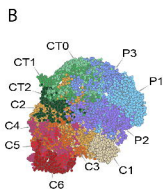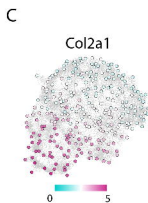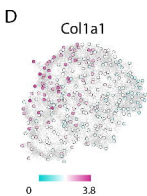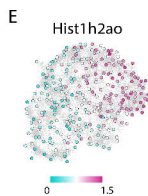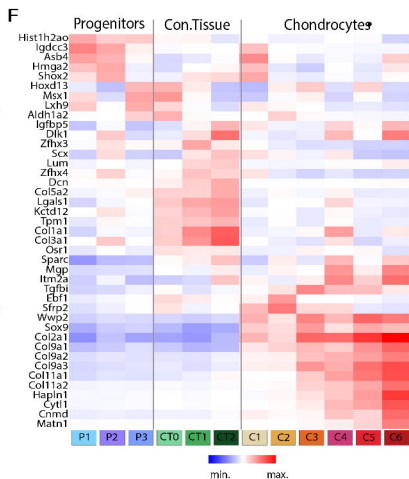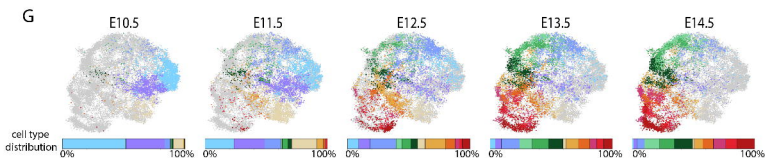

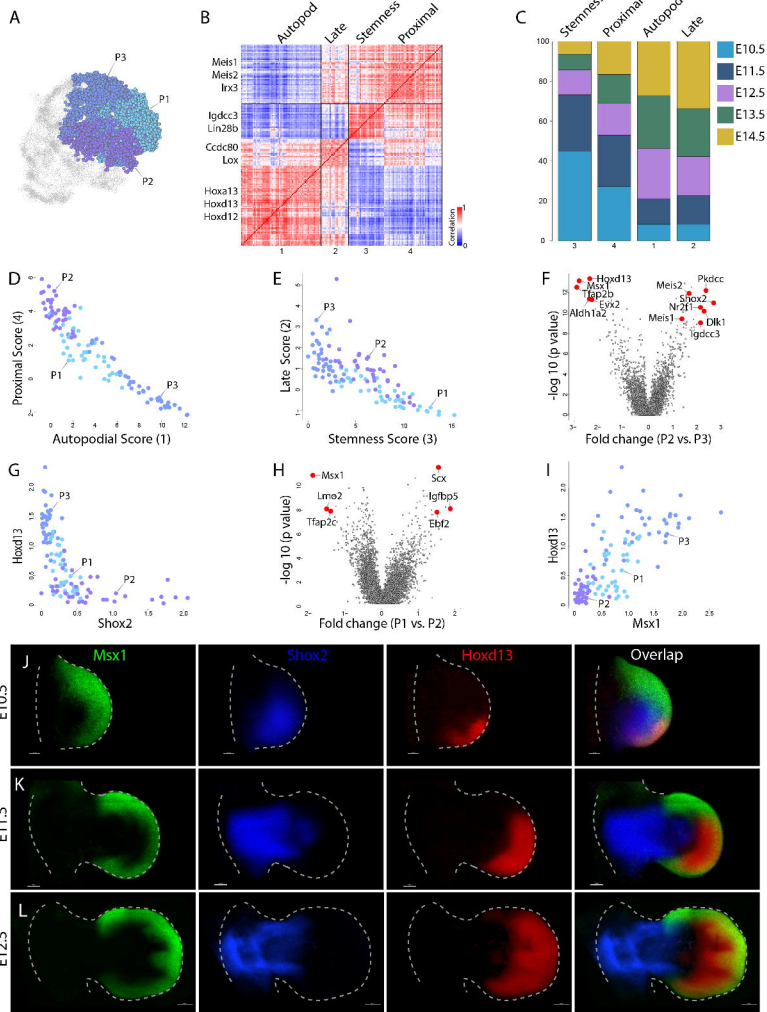

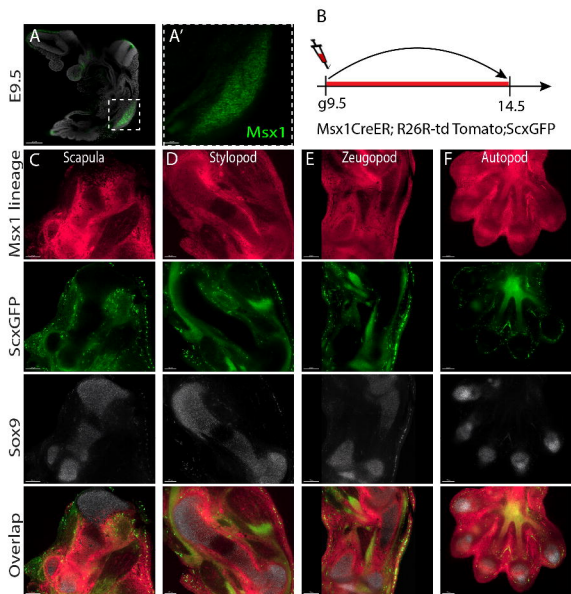

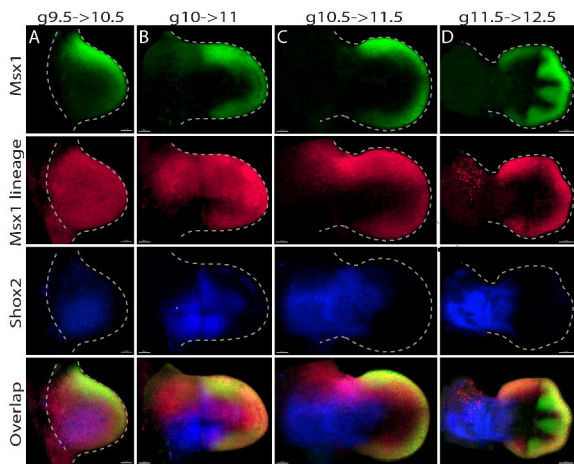

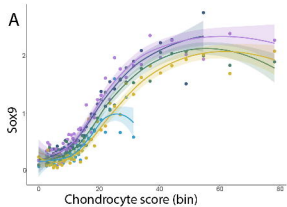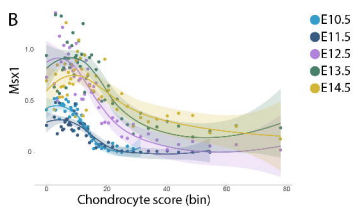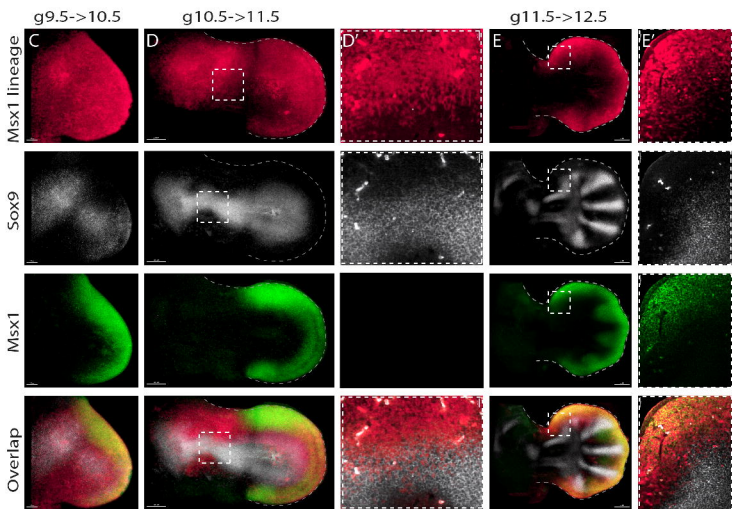

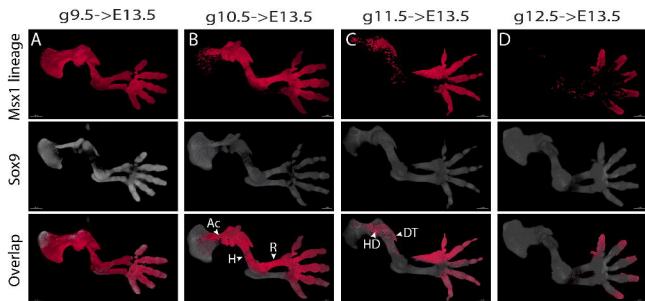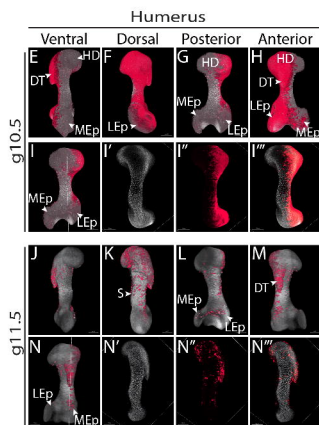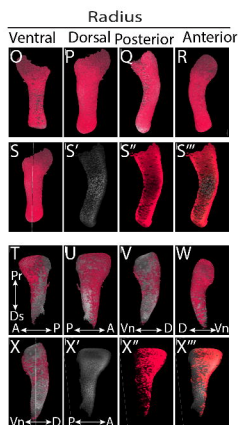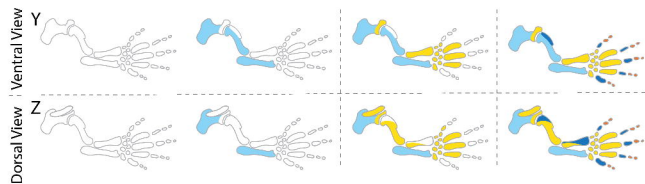

Differentiation sequence

|       |       |       |        |
|-------|-------|-------|--------|
|       |       |       |        |
| E10.5 | E11.5 | E12.5 | >E12.5 |



g10.5 → E11.5

Dorsal

Ventral

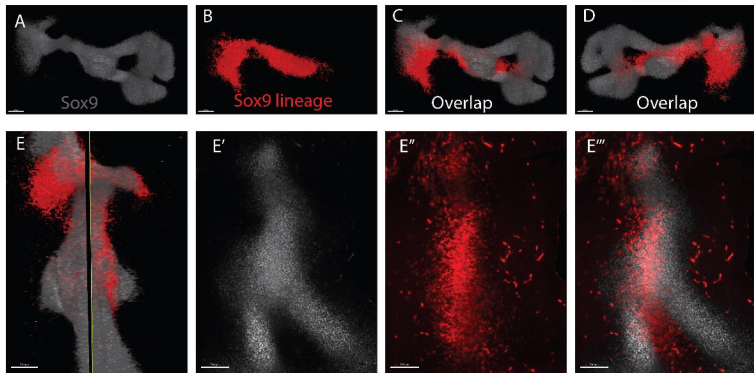

g10.5 → E13.5

Dorsal

Ventral

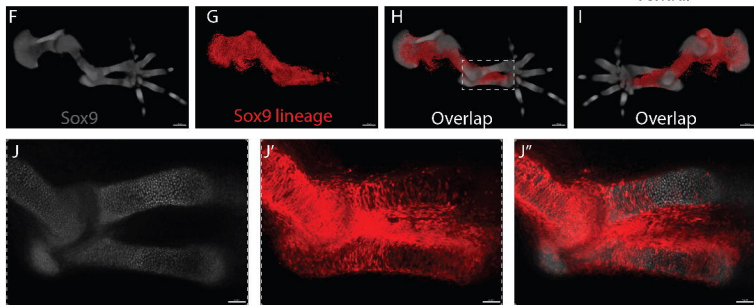

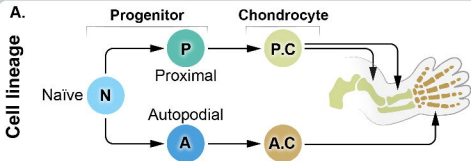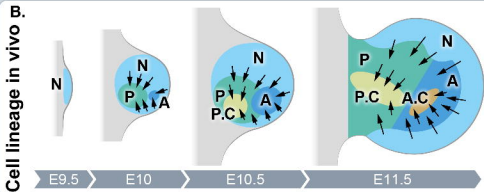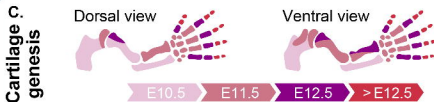



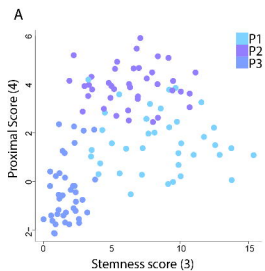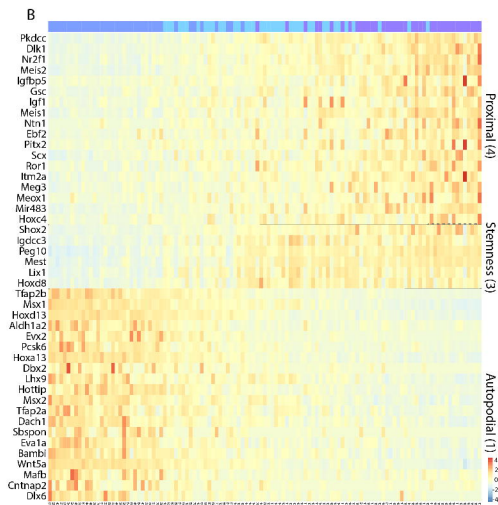

E10.5

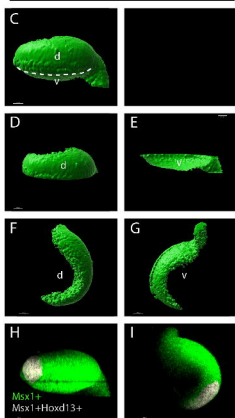

E11.5

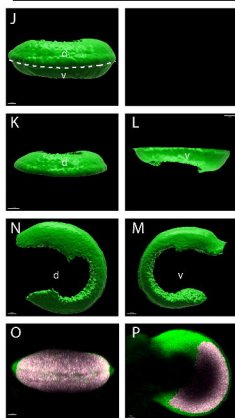

E12.5

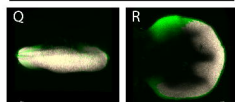

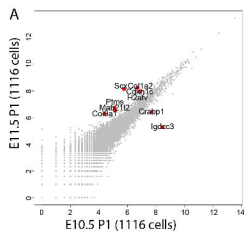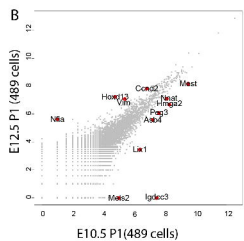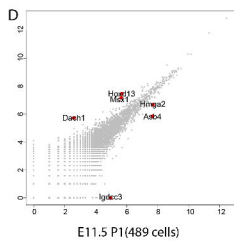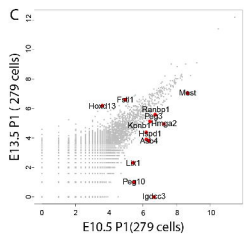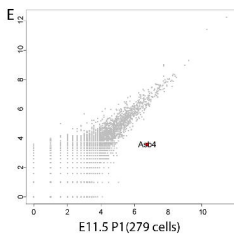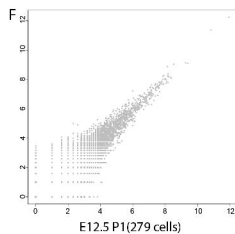

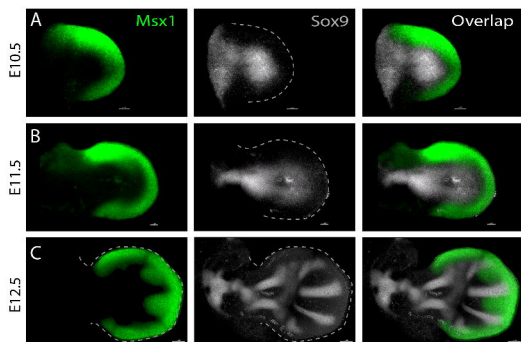

Ventral View

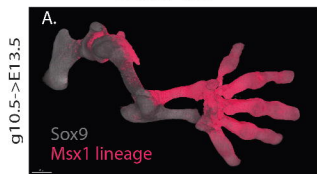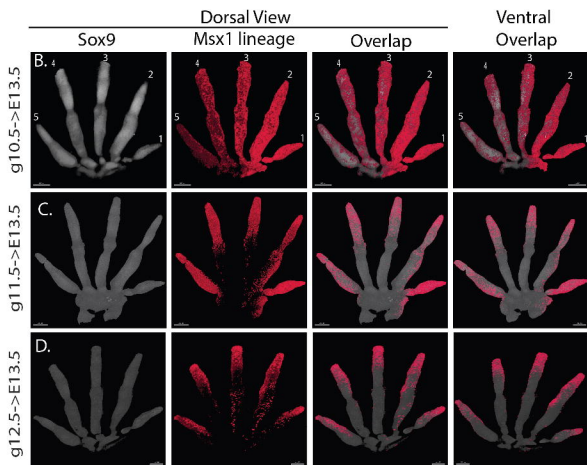

Source: https://www.biorxiv.org/content/10.1101/2022.05.07.490557v1.full.pdf
